# Supplementary material for: Exploring systemic RNA interference in insects: a genome-wide survey for RNAi genes in Tribolium
Source: Springer Nature journal article supplement (doi:10.1186/gb-2008-9-1-r10), 2008-01-17

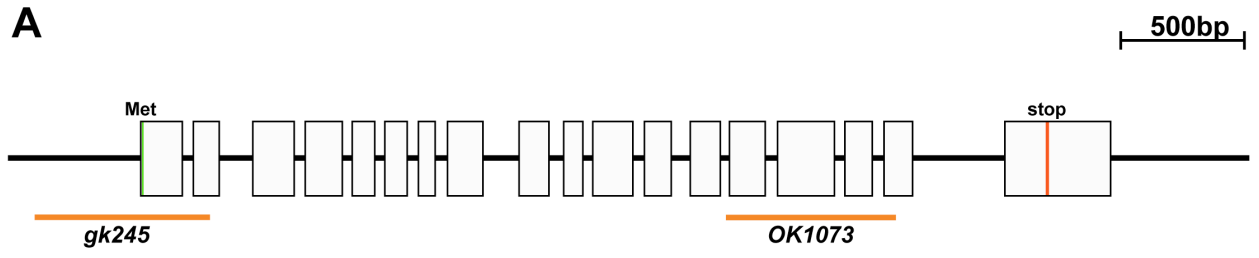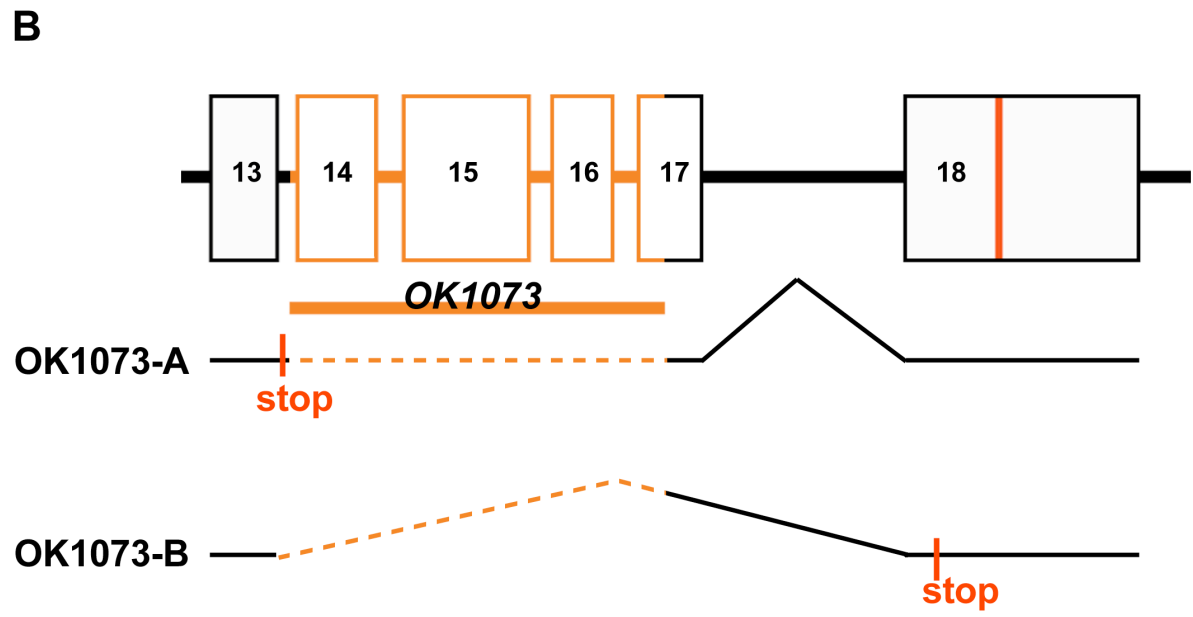

Supplement: Additional file 6 [file gb-2008-9-1-r10-s6.pdf]
