# Supplementary material for: Exploring systemic RNA interference in insects: a genome-wide survey for RNAi genes in Tribolium
Source: Springer Nature journal article supplement (doi:10.1186/gb-2008-9-1-r10), 2008-01-17
Supplement: Additional file 8 [file gb-2008-9-1-r10-s8.pdf]

Table S8: RNAi and miRNA components in *Tribolium*, *Drosophila* and *C.elegans*

|                            | <i>Tribolium</i>             | <i>Drosophila</i> | <i>C. elegans</i> *               | Remarks                                                                                                               |
|----------------------------|------------------------------|-------------------|-----------------------------------|-----------------------------------------------------------------------------------------------------------------------|
| <b>dsRBM proteins</b>      | R2D2                         | R2D2              | Rde-4                             |                                                                                                                       |
|                            | C3PO                         |                   |                                   |                                                                                                                       |
|                            | Loquacious                   | Loquacious        |                                   |                                                                                                                       |
|                            | Pasha                        | Pasha             |                                   |                                                                                                                       |
| <b>Dicer</b>               | Dicer-1                      | Dicer-1           | Dicer-1                           | While Tc-Dcr-1 appears orthologous to Dm-Dcr-1, the domain architecture of Tc-Dcr-1 is more similar to that of CeDcr1 |
|                            | Dicer-2                      | Dicer-2           |                                   |                                                                                                                       |
|                            | Drosha                       | Drosha            |                                   |                                                                                                                       |
| <b>1°Argonaute</b>         | Argonaute-1                  | Argonaute-1       | Alg-1<br>Alg-2                    |                                                                                                                       |
|                            | Argonaute-2a<br>Argonaute-2b | Argonaute-2       | Rde-1<br>Ergo                     |                                                                                                                       |
|                            | Argonaute-3                  | Argonaute 3       | Prg-1                             |                                                                                                                       |
|                            | PIWI                         | PIWI<br>Aubergine | Prg-2                             |                                                                                                                       |
| <b>2°Argonaute</b>         |                              |                   | SAGO-1<br>SAGO-2<br>PPW-1<br>PPW2 |                                                                                                                       |
| <b>RdRP</b>                |                              |                   | Ego-1<br>RRF-1<br>RRF-3           |                                                                                                                       |
| <b>Eri-1 like nuclease</b> |                              |                   | M02B7.2                           |                                                                                                                       |
|                            |                              |                   | Eri-1                             |                                                                                                                       |
|                            | Snipper                      | Snipper           |                                   |                                                                                                                       |
| <b>Sid-1-like</b>          | SilA<br>SilB<br>SilC         |                   | Y37H2C1<br>Sid-1<br>Tag-130       | The orthology between the Tc Sil proteins and the Ce Sid like proteins is not resolved                                |

\* *C.elegans* column does not show the whole inventory. Only some representatives are shown.
