# Supplementary material for: Exploring systemic RNA interference in insects: a genome-wide survey for RNAi genes in Tribolium
Source: Springer Nature journal article supplement (doi:10.1186/gb-2008-9-1-r10), 2008-01-17
Supplement: Additional file 9 [file gb-2008-9-1-r10-s9.pdf]

Table S9

| Candidate Gene | Primers     | Sequence                      | Product Size |
|----------------|-------------|-------------------------------|--------------|
| Dicer-1        | Dicer1 F2   | AGGCTCTAATCGGGGCGTATCTGA      | 473bp        |
|                | Dicer1 R2   | GTTGCGGAAGTAGCGGTGGAAGC       |              |
| Dicer-2        | Dicer2 F1   | TGCGCCATCCACCCGTTTTCTGC       | 413bp        |
|                | Dicer2 R1   | TTATCCCGCTTGGCTTACCTTCTA      |              |
| Argonaute-1    | Ago1 F1     | CAGAGTTTGGGCCATCGCTTGTTT      | 476bp        |
|                | Ago1 R1     | TATTGTCGCCGGCTGGAGGATGA       |              |
| Argonaute-2a   | Ago2a F1    | GCCGCCGACTCTGCTGTATGC         | 425bp        |
|                | Ago2a R1    | TGGCGATTATTTGCGGGTTGAGTT      |              |
| Argonaute-2b   | Ago2b F2    | TGGAGGGCGGACAGGAATAGGTTT      | 580bp        |
|                | Ago2b R2    | GCAGCCGCCAGCAGATGTTGT         |              |
| sid like A*    | sidA RCE R2 | GTTGGGGATTTTGGTCTGCCGATGTAGTA | 854bp        |
| sid like B     | sid1B F1    | ACCGGAGATTTTCGACCTGTGC        | 944bp        |
|                | sid1B R1    | CTGTCGTA AAAAGTCCGCAAAAATG    |              |
| sid like C     | sid1C F1    | GCACATCCTTTGGGGGTTATCAG       | 929bp        |
|                | sid1C R1    | GCGCTCAAAAAGTGCCAAATGT        |              |

\* there is no forward primer for this clone since this is a 5'RACE product.  
5' side of this clone begins with ACTACAAGTTCCATGATAAG
