# Supplementary material for: Exploring systemic RNA interference in insects: a genome-wide survey for RNAi genes in Tribolium
Source: PubMed Central journal article supplement (PMC2395250; doi:10.1186/gb-2008-9-1-r10), 2008-01-17
Supplement: gb-2008-9-1-r10-S1.pdf [file gb-2008-9-1-r10-S1.pdf]

# S1. Multiple Alignments used for pylogenetic analyses

## Dicer proteins (without Drosha)

Tc-Dicer1 1 PREYQVELLDLSAKKFNITIVCSSASSAKAFITIKLLQEFSSHKMRVPHG----KQALFVLDG  
Dm-Dicer1 1 PRDFQVELLATAYERNITICLGHRSSEKFIALKLLQELSRARRRHGR----VSVYLSCEV  
Ce-Dicer1 1 PRDYQVELLDKATKKNTIVQLGTGSGKTFIAVILLKEYGVQIFAPLDQGGKRAFFVVEKV  
Tc-Dicer2 1 PRNYQVNLMEIAIRENTIITYLPTGSGKTFIAIMVLKQLCAPILRPYSDGGKISVILVNSV  
Dm-Dicer2 1 PRGYQLRLVDHLTKSNGIVYLLPTGSGKTFVAILVLKRESQDFDKPIESGGKRALFMCNTV

Tc-Dicer1 57 PNVPIMTSHVKLLTDLIVTSDIKEESIHKASNVIVITAEVCVLLCKKNFVHLDSEYALIVID  
Dm-Dicer1 57 GTSTEPCSIYTMILTHLIDLRVWQEQCWTDYHVSILRPEGFLYLLLETRELLSSVELIVLE  
Ce-Dicer1 61 NLVEQQAIHIEVHTSEFKVGVHGGQTFMKRHHVWVITAOCLLDLIRHAYLKIETDMCVLIFD  
Tc-Dicer2 61 ALVDQHGKYVRDHATFSVGTYYTGEMQFNKYQVVMITSOIMVNLINNRIFIDLGVNLMIFD  
Dm-Dicer2 61 ELARQQAMAVRRCITNEKVGFFVGEQELKKNQVVLVGTAVFLDMVVTQTYVALSSLSVVIID

Tc-Dicer1 117 CLYGGQ-QSLVREIMARYQAIQAPRPRILGLTAGLIGSEMOPDRLEAEILQRLEKLLSSSV  
Dm-Dicer1 117 DCHDSA-VYQRIRPLFENHIMPAPRPRILGLAGPLHSAGCELQQLSAMLATLEQSVLCQI  
Ce-Dicer1 121 ECHHALGSQLPYSIMVDYKLLKKVPRVLGLTASLIKAKVAPEKLMEQKKLESAMDSVI  
Tc-Dicer2 121 ECHHGVEDQPMRQIMKHEHSCDK-PRVLGLTATLLNCKLSKVMDEIRSLVETFHASKV  
Dm-Dicer2 121 ECHHGTGHHPFREFMRLTIANQTLPRVGLTGVLLKGNELTNVATKLELEITYRGTV

Tc-Dicer1 176 DTSSIELTLIRLSRPRERIDPKEQPLSFFDDELEILLDDLGPSADRAAYGMLIKIEKIK  
Dm-Dicer1 176 ETASDIVTVLRYCSRPEHYIDPKVDPLNVINSLLVVLEHMGPWCTQRAAHHFYQCNEKIK  
Ce-Dicer1 181 ETASDLVSLISKYGAAPYEVVDFRPIKDSIKTTRAVFRQLGPWAAWRTAQVWEKELKIK  
Tc-Dicer2 180 ATVEGLDVVVGYSTNPQELFDVLKSLRNLIISDLMIHIEMLGAFGGHIACVAHMIQIERIK  
Dm-Dicer2 180 SDTKEMENVMLYATKPTVM-KKSFVKQLFNDFLYQMKYGIYAASIAIISLIVEFDIKR

Tc-Dicer1 236 VKVPYERHYLLICVASSVLVSIRALCELEFQDYVFRFSTPKVLRFLQVLLQFKPLCALVF  
Dm-Dicer1 236 VKTPHERHYLLYCHVSTALIQLYSLCEHAFHRHIERYS SPKVRRLIQTLRCFKPLCALIY  
Ce-Dicer1 241 SQVLPDKTLRFLNMAKTSMTITIKRLEPEMKKILRPYVPOVIRLFEILETENPLSALIF  
Tc-Dicer2 240 KHCQNHQLEIVLNYVMTIMGTIKLLEETMAGYIRKFSDDKVLKVFEILDEYKTLCCLVF  
Dm-Dicer2 239 RQAETLSVKLMHRTALTICEKIRHLLVQKIQDMIMNFSIPKVQRELMSLKVSFAICCLVF

Tc-Dicer1 296 VKNRYKAEALFALLCVMSKSDSEYVWVSVSFSVKNKIADPVREPREAES EHKRQEEVLRKY  
Dm-Dicer1 296 CNONHTARVLFELLAETSRDPDLKFLRCQYTTDRVADPTEPKAELEHRRQEEVLRKF  
Ce-Dicer1 301 VDRYIAYSLLMMRHIKSWEPKFKFVNPDYVVG-ASGRNLASSDSQGLHKRQTEVLRRF  
Tc-Dicer2 300 TKRRFTAKVLLHHLLDKASQVDPKEYHIKSNFVVGKNNPYNDFRENLYITKKNREVLNRF  
Dm-Dicer2 299 VERRYTKCKLYGLLLNYIQSTPELRLVITPOFMVG--RNNISPDFESVLERKWKQSAIQQF

Tc-Dicer1 356 RSHECNIMIAATSALEQGCPLPKCNLVIRFDLIPQSEHSYIHSKARARANEAHFLLANNEV  
Dm-Dicer1 356 RMHDCNVLIQTSVLEEGIDVPCNLVVRWDPPPTTYRSYVQCKGRARAAAPAYHVIIVASTT  
Ce-Dicer1 360 HRNEINCLIAATSVLEEGVDVKQCNLVIKFDRPLDMRSYVQSKGRARRAGSRVITVE--E  
Tc-Dicer2 360 VSKEINVLVSSNVLEEGVDIPKCTLVIKFDSYRSYIQSKGRARHIKSLMYTIVETDV  
Dm-Dicer2 357 RDGNANLMICS SVLEEGIDVQACNHVIFILDVVKTFNMYVQSKGRARTTEAKFVLF TAKER

Tc-Dicer1 416 SDFVRYCAKLPSDTFTTRITTEIWHEEKVENGSIRLPINSPVKKTVTSPPMINTLLARRAAA  
Dm-Dicer1 416 KDLVKYCARLPSDTFTKLTALWRCTRNERATIRLPINSPLKHDI VGLPMPQTQTLAARRLAA  
Ce-Dicer1 418 KDTAAYCSKLPSDIFTRIVPHNQIIPIEENELLLPINSPIKHAIVLKPMPNKKTAQMAVA  
Tc-Dicer2 420 AKYDRYCSNLSADKYTTYAPEWYVE--EDSVIFLPMVCPLIDPIVGPYMHNNKDAKRAAA  
Dm-Dicer2 417 EKTIRYQQTIPIDAFGFVIPWFHVLQEDERSINMPVNCMLRDTIYSDPMDNVKTAKISAA

Tc-Dicer1 476 FMICQLLHKAGELDDNLQPIGKEDPRPGTTKRRQYKYKVVADAILDCHPIIGQPTYFYKI  
Dm-Dicer1 476 IQACVELHRI GELDDQLQPIGKEEPRPGTTKRRQYKYKRIASEFCDCRPVAGAPCYLYFI

Ce-Dicer1 478 LEACRQLHLEGELEDDNLLPKGREAAKVGSSKRRQLYDKKIARATNESFVEADKCEFTIYAF  
Tc-Dicer2 478 LVACIKLHQCGELDDNLLPWKKQ--DAGNKKKKRLHDKETIAPSVKSAIQPD-RVLYLHTTI  
Dm-Dicer2 477 FKACKVLYSLGELNERFVPKTLTKTVNKADKSKDRTYKTECPLEFYDALPRVGEICYAYEII

Tc-Dicer1 536 VMKLTCPLEPEEQNTRGRKIYPPEDSPQGFGLITSKEIPKISAFPIFTRSGEVSVLDLQICCS  
Dm-Dicer1 536 QLTLCQPIPEEQNTRGRKIYPPEDAQQGFGLITTKRIPKISAFSIFTRSGEVKVSLELAK  
Ce-Dicer1 538 ELERFREAEELTLNPKRRKFEDEFNYEYCFGLLSAKEIPKIPFPVFLROGNMKVRLIVAP  
Tc-Dicer2 535 NINPOYKRSDDLKN-AVTLYDLYKTPLKFGLLSPKPIPDLCCKEPLFDSNGTLEIETRNNV  
Dm-Dicer2 537 FLEPQFESCEYTEHMYLNIQTERN----YAILLRNKLPRIAEMLIFSNOGKLVVRVANAP

Tc-Dicer1 596 Q-LIVTENQICKIREFLNYTFTSVLRLQKYLTLFNPDA SANSYLVPTIIDCAT--TTVDW  
Dm-Dicer1 596 ERVILTSEQIVCINGFLNYTFTNVLRLQKFLMLFDPDSTENCVFIIVPTVKA PAGGKHIDW  
Ce-Dicer1 598 KKTIVTAAQLQELQLFHNYLFTQVQLQMKCTGNLEFDNAPLNTLIVPLNKRKDDMSYTIM  
Tc-Dicer2 594 REVEFAANEMKEMREFHFVFNLDLLEILKEFLIFDNTGMNSEMLIVVPVQDRCGDVCVDF  
Dm-Dicer2 593 LEVLIQNSQLELLHQFHGMVFRDILKIWHPPFVLDRRSKENSYLVVPLILCAGEQKCFDW

Tc-Dicer1 653 DFIDLIIYANLTVLPEIIPPEVRKSYEFDPKRYRDVMPWYRNQDQPFYVAEICSNLNPA  
Dm-Dicer1 656 QFLELIQANGNTMPRAVPDEERQAQFFDPQRFQDAVMPWYRNQDQPFYVAEICPHLSPL  
Ce-Dicer1 658 KYVSEVVANMENMPRI PKDEVRRQYKFNADYKDAIVMPWYRNLEQPYVAEILPEWRPS  
Tc-Dicer2 654 RVTRDNKNLKNKLEPAATERIN--LNVTEETYLHKIVSPWYRS--PPYVVTKVCPDKSAL  
Dm-Dicer2 653 ELMTNFRRLPQSHGSNVQREQQ-PAPRPEDTEGKIVTQWYANYDKPMLVTKVHRELTP

Tc-Dicer1 713 SDFPGSDYATFEEYYLRKYSIQIQNKSQHLLDVDHTSARLNFLTFRYVNRKGVALPTISSE  
Dm-Dicer1 716 SCFPGDNRYRTFKHYLVKYGLTIQNTSQPLLDVDHTSARLNFLTFRYVNRKGVALPTISSE  
Ce-Dicer1 718 SKFPDTHETTFNEYFVKKYKLEIYDQNSLLDVDFTSTRLNLLQPRIQNPFRSRTVSNS  
Tc-Dicer2 710 SRFPNHEYPNFVSYSEKHSLSILDPSQPLLVKGLSERLNAFKPRGAGGKRKKEKMYEE  
Dm-Dicer2 712 SYMENQDQKTYEFTMSKYGNRIQDGVVHKDKFMI EVRDLTEQLTFYVHNRGKFNAKSKAK

Tc-Dicer1 773 QKQILVPELCAIHPFSASLWRKAVCLPCILYRINALLLADQIRRTVALEINLKGKIELDS-  
Dm-Dicer1 776 QKQILVPELCTVHPFPASLWRTAVCLPCILYRINGLLADDIRKQVSADLGLGRQQIEDE  
Ce-Dicer1 778 QRQILVPELMDIHPISATLWNVIAALPSIFYRVNQLLLTDELRETILVKAFGKEKTKLDD  
Tc-Dicer2 770 LEEYLIPELVIKQEFPSCLWIQARFLPSIILSRAYLILKLQQLQVDIARGIGAKAEYIKDC  
Dm-Dicer2 772 MKVILLIPELCFNFNFGDLWLKLIIFLPSILNRMVFLHAEALRKRFRNTYLNHLLLPFNGT

Tc-Dicer1 832 EFKWPPPLNFGWSLADVILKSKDEEKKKQEKIEPVGSPNVLLQAL TMSNANDGINLERLE  
Dm-Dicer1 836 DFEWPMPLDFGWSLSEVILKKSRESKQKESIKDDTIGPSPSIILOAL TMSNANDGINLERLE  
Ce-Dicer1 838 NVEWNSLAYATEYEEKQTIIVKKIQQLRDLNOKSGVSPCLLITALTTSNAADGMSLERFE  
Tc-Dicer2 830 PPLELNLHLLHYEPNDPQLTQESDKSTPIIDNCISPNLCQIYQALTAABANDIVNLERLE  
Dm-Dicer2 832 DYMPPRPLEIDYSIKRNVDP LGNVIPTEDIIEPKSPAEQGEFLAATASSAADVFDMERLE

Tc-Dicer1 892 TIGDSFLKYAITNYLYSKYENVHEGKLSHLRSKQVSNLNLNLYRLGRRKGLGEYMIATKFDP  
Dm-Dicer1 896 TIGDSFLKYAITTYLYITYENVHEGKLSHLRSKQVANLNLNLYRLGRRKRLGEYMIATKFEF  
Ce-Dicer1 898 TIGDSFLKFATTDYLYHTLLDQHEGKLSFARSKEVSNONLYRLGKKLGTIPQLIVANKFDA  
Tc-Dicer2 890 TIGDSFLKFVASLYIFKFPPTYNEGKSTTLKGLKLVSNKNLYYLGVRRKNLGGI LKNSDLSF  
Dm-Dicer2 892 IIGDSFLKLSATLYLASKYSDWNEGTLIEVSKSLVSNRNLLFCLIDADIPKTIINTIQETP

Tc-Dicer1 952 HDNWLPPCFYVVPKELIEEIPYNLVITQHSIPDKSIADDCVEALIGAYLIECGPRGALLFMAWL  
Dm-Dicer1 956 HDNWLPPCYVVPKELIEKIPYNLVISQHSIPDKSIADDCVEALIGAYLIECGPRGALLFMAWL  
Ce-Dicer1 958 HDSWLPPCYIPTCDFKALPYNLLTQQHISDKSIADAVEALIGVHLLTLGPNPTLKVMMNWM  
Tc-Dicer2 950 SDWVPPCFCTIPQTI SKNMCNFNLNKQYVGDKSIADSV EALIGAYFLSGGTOGGIKFMEMI  
Dm-Dicer2 952 RYTWLPPGISLPHNVLAEVNFCVGLVTIPNKVIADTLEALLGVIIVKNYGLQHAFAKMLEYF

Tc-Dicer1 1012 GIRVLPPEEELDMLLDGYDQFERHIGYKFRDRSYLLQALTHASFSPNTITDCYQRLEFLG  
Dm-Dicer1 1016 GVRVLPATEELDQLLSGFEFEESLGYKFRDRSYLLQAMTHASYIPNRIITDCYQRLEFLG  
Ce-Dicer1 1018 GLKVIQNFLNNLWQQFQFOTQLEEKIGYRFKERAYLVQAETHASYINNRVTGICYQRLEFLG  
Tc-Dicer2 1009 GILPLSTKTVDVDFHMPQWREIEQRLGYTFTNRAFLQALTHSSYSPNRIITLSYERLEFLG  
Dm-Dicer2 1012 KICRADNTTEIDGFLINHYYLEKNLGYTFKDRRYLLQALTHPSYPTNRIITGSYQELEFLG

Tc-Dicer1 1072 DAVLDYLITRHLIEDTRMHSFGALDRLSALVNNTIFASLAVRNGFHRVFRNLSPSLNEV  
Dm-Dicer1 1076 DAVLDYLITRHLIEDPRQHSFGALDRLSALVNNTIFASLAVRHGFHKKFRRHLSPLNDV  
Ce-Dicer1 1078 DAVLDYMITRYLFEDSRQYSPGVLTDLRSALVNNTIFASLAVKFEFFQKHFTIAMCPGLYHM  
Tc-Dicer2 1069 DAVLDFLITCYIFEHCGHLEPGQVTDLRSALVNNTIFASLAVVRCGFHKELEMMNSNLQGH  
Dm-Dicer2 1072 DAILDFELISAYIFENNTKMNPGALDRLSALVNNTIACIVRHRHLHFFILAEAKLSEI

Tc-Dicer1 1132 VEKfVRLQEDSGHTIVDEILYLVVET--EEVEDVEVPKALGDVFEVAGAIIFLDSGMSLDA  
Dm-Dicer1 1136 IDRfVRIQQENGHCTISEEYILLSEEECDDAEDVEVPKALGDVFESTAGAIIFLDSNMSLDV  
Ce-Dicer1 1138 IEKfVKLCSEDTNFNAEMYMVMTTEEIIQBEDIEVPKAMGDI FESVAGAIYLDGRNLDV  
Tc-Dicer2 1129 IDKfADYLASKNYVIDDEVLLLEEDENIAEYVDVPKVLGDI FEALAGAIYLDNKNLKT  
Dm-Dicer2 1132 ISKfVNFQESQGHRTVNYVRILLLEADNMSTNVDPKALGDVLEALIAAVYLDRC-DLQR

Tc-Dicer1 1190 VVKVYYNMMKSEIEQFSNKPVPKSPIRELELEPETAKFGKPEKLADGRVRVTVVEVFGVF  
Dm-Dicer1 1196 VWHVYSNMMSPETIEQFSNSVPKSPIRELELEPETAKFGKPEKLADGRVRVTVDFVGTTF  
Ce-Dicer1 1198 TWQVIHFHMRGTIELCCANPPRSPIRELMEFEQSKVRFKMERILESGKVRVTVVEVVMRF  
Tc-Dicer2 1189 VWRVYFKIIVREIDLFSKNVPKNVIRRLYECHTVYPPQFSK--ALEVGNQKTMVDFMGRV  
Dm-Dicer2 1191 TWEVIFENLFEPELQEFTRKVPINHIRQLVEHKKHAKPVFSSP--IVEGETVMVVSCTCMEKV

Tc-Dicer1 1250 KGI GRNYRIAKCTAAKCALKNLKK  
Dm-Dicer1 1256 RGI GRNYRIAKCTAAKCALRQLKK  
Ce-Dicer1 1258 TGMGRNYRIAKATAAKRALKYLHQ  
Tc-Dicer2 1247 HGFGTNKLIAKRAAAKIALRALKL  
Dm-Dicer2 1249 YGFGSNKDQAKLSAAKHALQQLSK

## Dicer proteins (with Drosha)

Tc-Dicer1 1 HPGSPNVLLQAL TMSNANDG TNLERLETIGDSFLKVAITNYLYSKYENVHEGKLSHLRS  
Dm-Dicer1 1 HPGSPSII LQAL TMSNANDG TNLERLETIGDSFLKVAITTYLYITYENVHEGKLSHLRS  
Tc-Dicer2 1 NQSPNLCQIYQAL TAAEBANDIVNLERLETIGDSFLKVASLYIFKFPPTYNEGKSTTLKG  
Dm-Dicer2 1 ITPAEQGEFLAAITASSAADVFDMERLEILGDSFLKLSATLYLASKYSDWNEGTLTEVKS  
Ce-Dicer1 1 GLGVSPCLLLTALTTSNAADGMSLERFETIGDSFLKEATTDYLYHTLLDQHEGKLSFARS  
Tc-Drosha 1 RAFTDRSVGYTNLTIG-----SNQRLEFLGDTIVLQLIASEYLYKYFPEHHEGHSLLRS  
Dm-Drosha 1 RAFTDRSIGFTHLTIG-----SNQRLEFLGDTIVLQLICSEYLYRHFPEHHEGHSLLRS

Tc-Dicer1 61 KQVSNLNLYRLGRRKGLG EYMIATKFTQHSIPDKSIADDCVEALIGAYLIECGPRGALLFM  
Dm-Dicer1 61 KQVANLNLYRLGRRKRLG EYMIATKFSQHSIPDKSIADDCVEALIGAYLIECGPRGALLFM  
Tc-Dicer2 61 KLVSNKNLYYLGVRRKNGEYI LKNSDLNKQYVGDKSIADSV EALIGAYFLSGGTOGGIKFM  
Dm-Dicer2 61 KLVSNRNLLFCLIDADIPKTLNTIQFGLVTIPNKVIADTLEALLGVIIVKNYGLQHAFAKML  
Ce-Dicer1 61 KEVSNONLYRLGKKLGLI PQLIVANKFTQQHSIDKSIADAVEALIGVHLLTLGPNPTLKVMM  
Tc-Drosha 55 SLVNNRTQAVVCDDLGM SNYAVYNNP-KAEIKTKDRADLLEAFI GALYVDQGEFCEVEFC  
Dm-Drosha 55 SLVNNRTQAVVCDDLGM PKYAVYANP-KADIKTKDRADLLEAFI GALYVDKGLLYCEQFC

|           |     |       |            |           |        |           |             |
|-----------|-----|-------|------------|-----------|--------|-----------|-------------|
| Tc-Dicer1 | 121 | AWLGI | RVLPQLEDGR | DRSYLLQAL | THASFS | PNRITLDCY | QRLE        |
| Dm-Dicer1 | 121 | AWLG  | RVLPITRQL  | DRSYLLQAM | THASYT | PNRITLDCY | QRLE        |
| Tc-Dicer2 | 121 | EWIG  | LPLSEIQ    | IRTNRAL   | LQAL   | THSSYSP   | NRITLSYERLE |
| Dm-Dicer2 | 121 | EYFK  | ICRADIDK   | PLKDRRY   | LQAL   | THPSYPT   | NRITGSYQELE |
| Ce-Dicer1 | 121 | NWMG  | LKVIQK     | DQKSKER   | AYLVQA | FTHASYI   | NNRV        |
| Tc-Drosha | 114 | QVTL  | FPRLQDF    | IMNQD     | WNDPKS | KLQQCCL   | LR          |
| Dm-Drosha | 114 | HVCL  | FPRLQL     | FIMNQD    | WNDPKS | KLQQCCL   | LR          |

## dsRBM proteins

|          |   |     |        |    |       |       |      |      |     |      |     |      |       |      |     |    |      |      |     |    |    |      |    |    |   |   |    |    |   |   |   |   |   |   |   |   |   |   |   |      |   |   |      |   |   |      |   |    |   |   |   |   |   |   |   |   |   |
|----------|---|-----|--------|----|-------|-------|------|------|-----|------|-----|------|-------|------|-----|----|------|------|-----|----|----|------|----|----|---|---|----|----|---|---|---|---|---|---|---|---|---|---|---|------|---|---|------|---|---|------|---|----|---|---|---|---|---|---|---|---|---|
| Dm_R2D2  | 1 | KS  | AVSALQ | EF | CARTQ | INLPT | YSFI | PG   | EDG | ---- | GY  | VCKV | EILEI | ---- | EAL | GN | GR   | SK   | RD  |    |    |      |    |    |   |   |    |    |   |   |   |   |   |   |   |   |   |   |   |      |   |   |      |   |   |      |   |    |   |   |   |   |   |   |   |   |   |
| Tc_R2D2  | 1 | KTP | AMV    | LQ | EFTM  | KR    | GFSP | PEYI | LV  | MS   | KT  | GT   | HENE  | E    | HY  | KV | NVAN | ---- | CGL | GF | GR | SK   | QV |    |   |   |    |    |   |   |   |   |   |   |   |   |   |   |   |      |   |   |      |   |   |      |   |    |   |   |   |   |   |   |   |   |   |
| Tc_C3PO  | 1 | KTP | IS     | LQ | EL    | MA    | ARGI | SL   | PV  | YIE  | EEG | ---- | FG    | T    | SF  | K  | CT   | V    | K   | AG | GV | ---- | AC | GY | G | T | SK | KN |   |   |   |   |   |   |   |   |   |   |   |      |   |   |      |   |   |      |   |    |   |   |   |   |   |   |   |   |   |
| Dm_Loqs  | 1 | KTP | V      | S  | I     | LQ    | EL   | S    | R   | R    | G   | -    | I     | T    | P   | G  | Y    | E    | L   | V  | Q  | I    | E  | G  | A | I | H  | E  | P | T | F | R | F | V | S | F | K | D | - | D    | T | P | F    | T | A | M    | G | A  | G | R | S | K | K | E |   |   |   |
| Tc_Loqs  | 1 | KTP | V      | S  | V     | LQ    | EL   | S    | R   | R    | G   | -    | A     | T    | P   | K  | Y    | E    | L   | V  | Q  | I    | E  | G  | A | I | H  | E  | P | I | F | R | Y | R | V | F | I | N | N | ---- | D | L | V    | A | T | G    | T | GR | S | K | K | D |   |   |   |   |   |
| Dm_Pasha | 1 | K   | S      | F  | V     | C     | I    | L    | H   | E    | Y   | M    | Q     | H    | A   | L  | K    | T    | Q   | P  | T  | Y    | E  | F  | K | E | L  | Q  | N | A | A | T | P | Y | S | A | T | V | S | V    | N | N | L    | K | Y | ---- | G | T  | G | Y | G | T | S | K | K | Q |   |
| Tc_Pasha | 1 | K   | S      | Y  | V     | C     | I    | L    | H   | E    | Y   | M    | Q     | H    | A   | L  | K    | K    | Q   | P  | T  | Y    | K  | F  | T | E | L  | E  | N | A | A | T | P | Y | A | A | T | V | S | I    | N | D | M    | Q | Y | ---- | C | V  | G | Y | G | T | S | K | K | Q |   |
| Hs_TRBP2 | 1 | K   | T      | P  | I     | S     | L    | Q    | E   | Y    | G   | T    | R     | I    | G   | -  | K    | T    | P   | V  | Y  | D    | L  | K  | A | E | G  | A  | H | Q | P | N | F | T | F | R | V | T | V | G    | D | T | ---- | S | C | T    | G | Q  | G | P | S | K | K | A |   |   |   |
| Hs_PACT  | 1 | K   | T      | P  | I     | Q     | V    | L    | H   | E    | Y   | G    | M     | K    | T   | K  | -    | N    | I   | P  | V  | Y    | E  | C  | E | R | S  | D  | V | Q | I | H | V | P | T | F | T | F | R | V    | T | V | G    | D | I | ---- | T | C  | T | G | E | G | T | S | K | K | L |
| Hs_DGCR8 | 1 | K   | S      | E  | V     | C     | I    | L    | H   | E    | Y   | M    | Q     | R    | V   | L  | K    | V    | R   | P  | V  | Y    | N  | F  | F | E | C  | E  | N | P | S | E | P | F | G | A | S | V | T | I    | D | G | V    | T | Y | ---- | G | S  | G | T | A | S | S | K | K | L |   |

|          |    |   |   |   |   |   |   |   |   |   |   |   |   |   |   |   |   |   |   |   |   |   |   |   |   |   |   |   |   |   |   |   |   |   |   |   |   |   |   |   |   |   |   |   |   |   |   |   |   |   |   |   |   |   |   |   |   |   |   |   |   |
|----------|----|---|---|---|---|---|---|---|---|---|---|---|---|---|---|---|---|---|---|---|---|---|---|---|---|---|---|---|---|---|---|---|---|---|---|---|---|---|---|---|---|---|---|---|---|---|---|---|---|---|---|---|---|---|---|---|---|---|---|---|---|
| Dm_R2D2  | 52 | A | K | H | L | A | A | S | N | I | L | L | R | D | Y | C | V | R | R | E | M | P | L | P | C | I | E | V | V | Q | S | G | T | P | S | A | P | E | F | V | A | C | S | V | A | S | I | V | R | Y | G | K | S | D | K | K | D | A |   |   |   |
| Tc_R2D2  | 56 | A | K | H | N | A | A | S | K | A | L | L | K | D | M | C | E | F | K | L | P | Y | P | E | F | K | E | I | S | D | V | G | P | P | H | C | R | E | F | T | Y | E | C | C | I | A | S | I | T | Q | A | T | A | N | T | K | K | Q | A |   |   |
| Tc_C3PO  | 51 | A | K | H | E | S | A | K | N | A | L | L | N | E | Y | A | A | S | R | - | - | Y | G | A | K | Y | P | S | Y | D | F | L | T | V | S | V | D | G | E | F | F | F | K | C | S | F | A | N | E | S | I | G | E | G | M | N | K | K | D | A |   |
| Dm_Loqs  | 59 | A | K | H | A | A | A | R | A | L | L | Q | E | M | C | M | Q | R | R | W | P | P | P | S | Y | E | T | E | T | E | V | G | L | P | H | E | R | L | F | T | I | A | C | S | I | L | N | Y | R | E | M | G | K | G | S | K | K | I | A |   |   |
| Tc_Loqs  | 56 | A | K | H | A | A | A | K | N | L | L | Q | E | M | C | M | S | R | R | W | P | P | P | S | Y | E | M | E | H | E | E | G | L | P | H | E | R | Q | F | T | I | A | C | Q | V | L | K | F | K | E | V | G | T | G | K | S | K | K | L | A |   |
| Dm_Pasha | 55 | A | K | S | E | A | A | R | E | T | L | L | L | T | C | L | Q | R | N | Y | G | S | - | D | V | Q | I | S | Q | E | I | N | R | T | A | N | N | K | N | E | F | T | M | T | V | G | K | H | T | A | K | V | V | C | K | N | K | R | E | G |   |
| Tc_Pasha | 55 | A | K | S | E | A | A | R | A | T | L | L | L | T | C | L | Q | R | N | F | G | I | N | D | L | Q | I | S | Y | Q | G | N | T | L | K | N | K | N | Q | F | T | M | T | V | G | K | H | T | A | T | V | V | C | K | N | K | R | D | G |   |   |
| Hs_TRBP2 | 55 | A | K | H | K | A | A | E | V | A | L | L | Q | E | L | V | V | Q | K | G | W | R | L | P | E | Y | T | V | T | Q | E | S | G | P | A | H | R | K | E | F | T | M | T | C | R | V | E | R | F | I | E | I | G | S | G | T | S | K | K | L | A |
| Hs_PACT  | 55 | A | K | H | R | A | A | E | A | A | L | L | Q | E | L | A | I | H | H | G | W | R | L | P | E | Y | T | L | S | Q | E | G | G | P | A | H | K | R | E | Y | T | T | I | C | R | L | E | S | F | M | E | T | G | K | G | A | S | K | K | Q | A |
| Hs_DGCR8 | 55 | A | K | N | K | A | A | R | A | T | L | L | H | E | C | L | K | R | N | H | G | M | G | L | T | S | I | K | F | E | V | V | P | G | K | N | Q | K | S | E | Y | V | M | A | C | G | K | H | T | V | R | G | W | C | K | N | K | R | V | G |   |

|          |     |   |   |   |   |   |   |   |   |   |   |   |   |
|----------|-----|---|---|---|---|---|---|---|---|---|---|---|---|
| Dm_R2D2  | 112 | R | Q | R | A | A | I | E | M | L | A | L | I |
| Tc_R2D2  | 116 | K | Q | L | A | A | R | E | M | L | E | K | I |
| Tc_C3PO  | 109 | K | Q | D | S | A | R | K | M | L | E | L | V |
| Dm_Loqs  | 119 | K | R | L | A | A | H | R | M | W | M | R | L |
| Tc_Loqs  | 116 | K | R | M | A | A | H | K | M | W | Q | A | L |
| Dm_Pasha | 114 | K | Q | L | A | S | Q | A | I | L | Q | I | L |
| Tc_Pasha | 115 | K | Q | R | A | S | Q | A | I | L | Q | A | L |
| Hs_TRBP2 | 115 | K | R | N | A | A | A | K | M | L | L | R | V |
| Hs_PACT  | 115 | K | R | N | A | A | E | K | F | L | A | K | F |
| Hs_DGCR8 | 115 | K | Q | L | A | S | Q | K | I | L | Q | L | L |

## Argonaute proteins

|          |   |   |   |   |   |   |   |   |   |   |   |   |   |   |   |   |   |   |   |   |   |   |   |   |   |   |   |   |   |   |   |   |   |   |   |   |   |   |      |      |      |   |   |   |   |   |   |   |   |   |   |   |   |   |   |
|----------|---|---|---|---|---|---|---|---|---|---|---|---|---|---|---|---|---|---|---|---|---|---|---|---|---|---|---|---|---|---|---|---|---|---|---|---|---|---|------|------|------|---|---|---|---|---|---|---|---|---|---|---|---|---|---|
| Sp-Ago   | 1 | D | Y | I | F | F | I | L | D | K | N | S | P | E | P | Y | G | S | I | K | R | V | C | N | T | M | L | G | V | P | S | Q | C | A | I | S | K | H | I    | L    | ---- | Q | S | K | P | Q | Y | C | A | N | I | G | M |   |   |
| Tc-Ago2a | 1 | D | L | I | V | V | V | P | N | S | G | P | Q | - | Y | S | L | V | Q | A | A | E | L | N | V | G | C | L | T | Q | C | I | K | E | R | T | I | A | ---- | K    | L    | N | P | Q | L | I | A | N | I | L | L |   |   |   |   |
| Tc-Ago2b | 1 | D | L | I | V | V | V | P | N | S | G | P | Q | - | Y | S | F | V | Q | A | A | E | L | N | V | G | C | L | T | Q | C | I | K | E | R | T | I | G | ---- | R    | L    | N | P | Q | T | V | G | N | I | L | L |   |   |   |   |
| Tc-Ago1  | 1 | Q | L | V | V | V | V | I | P | G | K | T | P | V | - | Y | A | E | V | K | R | V | G | D | T | V | L | G | M | A | T | Q | C | V | Q | A | K | N | V    | N    | ---- | K | T | S | P | Q | T | L | S | N | I | C | L |   |   |
| Tc-Ago3  | 1 | M | V | A | F | I | C | P | T | L | R | A | D | R | Y | S | I | I | K | K | M | C | C | V | N | I | P | V | A | S | Q | V | I | L | S | K | T | L | S    | ---- | N    | P | Q | K | V | R | T | I | H | K | I | A | M |   |   |
| Tc-Piwi  | 1 | T | M | I | V | I | L | P | N | N | S | T | E | R | Y | S | A | I | K | K | K | C | Y | V | D | R | G | I | P | T | Q | M | F | V | A | R | N | L | T    | ---- | S    | K | G | V | M | S | A | T | K | V | A | I |   |   |   |
| Dm-Ago2  | 1 | D | L | A | I | V | I | P | Q | F | R | I | S | - | Y | D | T | I | K | Q | A | E | L | Q | H | G | I | L | T | Q | C | I | K | Q | F | T | V | E | R    | ---- | K    | C | N | N | Q | T | I | G | N | I | L | L |   |   |   |
| Dm-Ago3  | 1 | Q | M | V | V | C | I | C | H | N | R | R | D | D | R | Y | A | A | I | K | K | I | C | C | S | E | I | P | I | P | S | Q | V | I | N | A | K | T | L    | Q    | ---- | N | D | L | K | I | R | S | V | V | Q | K | I | V | L |

Dm-Piwi 1 KLIIICLVENDNAERYSSIKKRGYVDRAPTQVVTLLKTK-----KPYSLMSIATKIAI  
Dm-Aub 1 QIVMVVMRSPNEEKYSCIKKRRCVDRPVPSQVVTLLKVIAPRQQ---KPTGLMSIATKVVI  
Dm-Ago1 1 QLVVVVVLPGKTPV-YAEVKRVGDTVLTGMATQCVQAKNVN-----KTSPQTLISNLCL  
Ce-Alg1 1 TLVVVVVLPGKTPV-YAEVKRVGDTVLTGIATQCVQAKNAI-----RTTPQTLISNLCL  
Ce-Alg2 1 QLIVVVVLPGKTPI-YAEVKRVGDTVLTGIATQCVQAKNAI-----RTTPQTLISNLCL  
Ce-Prg1 1 HMLVVMLADDNKTRYDSLKKFLCVECPTPNOCVNLRTLAGKSKDGGENKNLGSIVLKIIVL  
Ce-Prg2 1 HMLVVMLADDNKTRYDSLKKYL CVECPTPNOCVNLRTLAGKSKDGGENKNLGSIVLKIIVL  
Ce-RDE1 1 VLMFIIISKRQLNAYGFVKHYCDHTIGVANQHTTSETVTKALASLRHEKGSKRIFYQIAL  
Ce-Ergo 1 RATVYSGNNNEYNDYNVLYKYLADNKYGIHTQGLEKSLGVVGPS-PKNCALTRLMVEKVL  
Ce-PPW1 1 TQLIFFVVKSRNYHQQLKALEQKYDVTQEIIRAETAEK-----VFRQPQTRLNIIN  
Ce-PPW2 1 TFLVLCITEDNITCLHQKYKFIHHTQMIVQDMKLSKALSVVN-----ASKKLTLENNVIN

Sp-Ago 52 KINVKVGGINCSLIP-KSNPLGNVP-TLILGGDVYHPGVGATG-VSTASIVASVD-LNGC  
Tc-Ago2a 51 KINSKLNGTNHILS--SRLPIMSRP-CIIMGADVTHPPGDAKDVPSVAAVTASHD-PNAF  
Tc-Ago2b 51 KINSKMNGTNHRLSPNSRPLIMKRP-CIIMGADVTHPPSPDARDIPSVAAVTASHD-PNAF  
Tc-Ago1 51 KINVKLGGINSILVPSIRPKIFNEP-VIFLIGADVTHPPAGDNKKPSIAAVVGSMD-AHPS  
Tc-Ago3 54 QITCKLGGTLWSVKIPVSG-----WMVCGIDVYHGA--NNQ--SVCCGFVASIN-GSMT  
Tc-Piwi 53 QMNCKLGGAPWCVPPIPLSG-----LMVVGVDVCRDT--VNKKKSEAGIVGSLD-KNIS  
Dm-Ago2 52 KINSKLNGINHKIKDDPRLPMMKN--TMYIGADVTHPPSPDQREIPSVVGVAAASHD-PYGA  
Dm-Ago3 54 QMNCKLGGSLWTVKIPFKN-----VMVCGIDSYHDP--SNRGNVAAAFVASIN-SSYS  
Dm-Piwi 54 QLNCKLGYTPWMEELPLSG-----LMTIGFDIAKST--RDRKRAYCALIASMDLQONS  
Dm-Aub 58 QMNAKLMGAPWQVVIPLHG-----LMTVGFVDVCHSP--KNKNKSYGAFVATMDQKESF  
Dm-Ago1 51 KINVKLGGINSILVPSIRPKVFNEP-VIFLIGADVTHPPAGDNKKPSIAAVVGSMD-AHPS  
Ce-Alg1 51 KMNVKLGGVNSILLPNVRPRIFNEP-VIFFGCDITHPPAGDSRKPSSIAAVVGSMD-AHPS  
Ce-Alg2 51 KMNVKLGGVNSILLPNVRPRIFNEP-VIFLIGCDITHPPAAGDTRKPSIAAVVGSMD-AHPS  
Ce-Prg1 61 QMICKTGGALWKNIPLKN-----TMIVGYDLYHDS--TLKGKTVGACVSTTS-NDFT  
Ce-Prg2 61 QMICKTGGALWKNIPLKS-----TMIVGYDLYHDS--TLKGKTVGACVSTTS-NDFT  
Ce-RDE1 61 KINAKLGGINQEISPEEKERRKTMPLTMYVGVGDVTHPTSYSGIDYSIAAVVASINPGGTI  
Ce-Ergo 60 GKVGTGAHKTWTIFTDPKAP-----TLVLGIDVSHPSTRDRETMSAATVVGNIID-LDVT  
Ce-PPW1 53 KTNMKLGGLNVAIGSEAFNKPN----RLIVGFVTSQRVGGNPDYPI SVCFANMLKHHQK  
Ce-PPW2 55 KTNVKLGGSNVYLDTKNFLQ----EHLIIIGVGLSSPPPGTKYILNPTIVGFAYN-GNGK

Sp-Ago 108 KYTAVSRSQPRHQEVEIEGMKDIVVYLLQGFAMTK-QQPQRIIYFRDGTSEGQFLSVIND  
Tc-Ago2a 107 QYNICWRLQPPKVELIEDLICAITVEQLMFFYRKTR-HKPETIVFFERDGVSEGQFAEVRRA  
Tc-Ago2b 109 QYNICWRLQPPKVELIEDLCNITVEQLKFFYQKTG-FKPESIVFFERDGVSEGQFKQVQRA  
Tc-Ago1 109 RYAATVRVQOHRQELIQEISSMVRELLIMFYKSTGGYKPHRIIYRDGVSEGQFLQLLQH  
Tc-Ago3 102 KYFSKAMFQD--GELIGDYFKMPFRQMLQAAKDRE-GAFPSKVIVFRDGVGDGQLEHCRKY  
Tc-Piwi 103 RFYNICCEHKMEEELSDNFAAA VLLCKQYKEQN-GHYPERILYRDGVGEGQLPFVVEH  
Dm-Ago2 109 SYNMQYRLQRGALLETEDMFSITLEHLRVYKEYRN-AYPDHIIYRDGVSDGQFPKIKNE  
Dm-Ago3 104 QWYSKAVVQTKREELVNGLSASFEIALKMYRKRN-GKLPNTIYRDGIGDGLYTCNLNY  
Dm-Piwi 105 TYFSTVTECSAFDVLANTLWPMIAKALROYQHEH-RKLPSRIVFYRDGVSSGSLKQLFEF  
Dm-Aub 109 RYFSTVNEHIKGOELSEQLSVNMALCALRSYQEQH-RSLPERILFFERDGVGDGQLYQVVNS  
Dm-Ago1 109 RYAATVRVQOHRQELIQEISSMVRELLIMFYKSTGGYKPHRIIYRDGVSEGQFPFVQLQ  
Ce-Alg1 109 RYAATVRVQOHRQELISDLTYMVRELLVQFYRNTR-FKPARIVVYRDGVSEGQFFNVLQY  
Ce-Alg2 109 RYAATVRVQOHRQELITDLYMVRELLVQFYRNTR-FKPARIVVYRDGVSEGQLFNVLQY  
Ce-Prg1 111 QFYSQTRPHENPTQLGNNLTHFVRKALKQYDSDNDQTLPSRLIYRDGAGDGQIPYIKNT  
Ce-Prg2 111 QFYSQTRPHENPTQLGNNLTHFVRKSLKQYDNDNDKTLPSRLIYRDGAGDGQIPYIKNT  
Ce-RDE1 121 YRNMIVTQEECRERTDILEAKFVKLLREFAENNDNRAPAHIVVYRDGVSDSEMLRVSHD  
Ce-Ergo 113 EFRASSRIQDTGVECLIDFSKEDERIGEIDHT-GKRPAAHIVVYRDGISEGDFQKYLFE  
Ce-PPW1 109 FAGGYVYVHRDLDVFGSITKDTLLAIFKTCTEQR--GRPDDILLYFNGVSEGQFSMINEE  
Ce-PPW2 110 QEFSGD-VLNAAQETIAPIEDIVSYSIKGYKKFHDGKAPKRITLYRSGSSEGNGHGPLISY

Sp-Ago 167 ELSQIKKACHSISP-----KYNPKILVCTTQKRHHAREFIKNKSDG--DRNGNPLPGTI  
Tc-Ago2a 166 ELSAIHQACKKLQRE-----GYEPRITFLVQKRHHTRIFPTNPRDSE-DRNNNV PAGTC  
Tc-Ago2b 168 EIAAIQKACKMLQKD-----DYEPKITFLVQKRHHTRIFPTNPRDSE-DKNNNV PAGTC  
Tc-Ago1 169 ELTAIREACIKLES-----DYKPGITFLVQKRHHTRIFCADKKEQS-GKSGNIPAGTT  
Tc-Ago3 159 EITQIQEVIKELNIE-----TTITFVQKRINTRIFRTVNETN----FENPPSGTV  
Tc-Piwi 162 EVANIKRKLQEEIYINGEVK-----MAFVVVSKRINTRIFTEKD-----NPPPGTV

Dm-Ago2 168 EIRCIKQACDKVG-----CKPKICCVIVVKRHHTRFFPSGDVTTS-NKFNNVDPGTV  
Dm-Ago3 163 EIPQFEMVCGNR-----IKISYIVVOKRINTRIFSGS-GIH----LENPLPGTV  
Dm-Piwi 164 EMKDIIEKLLKTEYARVQLSP---PQLAYIVVTRSMNTRFFLNGQ-----NPPPGTI  
Dm-Aub 168 EVNTLKDRLDEIYKSAGKQEG--CRMTFFIIVSKRINSRYFTGHR-----NPVPGTV  
Dm-Ago1 169 ELTAIREACIKLEP-----EYRPGITFIVVQKRHHTRIFCAEKKEQS-GKSGNIPAGTT  
Ce-Alg1 168 ELRAIREACMMLEP-----GYQPGITFIAVQKRHHTRIFAVDKKDQV-GKAYNIPPGTT  
Ce-Alg2 168 ELRAIREACVMLES-----GYQPGITFIAVQKRHHTRIFAADKADQV-GKAFNIPPGTT  
Ce-Prg1 171 EVKLVRDACDAVTDKAAEELSQEIKLAFIIVTKRVNMRIILKQGLDN----AINPQPGTV  
Ce-Prg2 171 EVKLVRDACDAVTDKAAEELSQEIKLAFIIVTKRVNMRIILKQSSKS----AINPQPGTV  
Ce-RDE1 181 EIRSLKSEVKQFMSERDGEDPE-PKYTFIIVLQKRHNTRILRRMEKESKETGIVNPPSSGTT  
Ce-Ergo 172 ERVCIIEERCLKIDTSFQP-----SITYIVVTKRHHTRIFLEDPSQGYESQGYNVLPGLT  
Ce-PPW1 167 FSARVKEACMAFQKEGTP--PFRPHITIIASSKAHNERLYKSDKGR-----IVNLEPGTV  
Ce-PPW2 169 EMPLARVAMRNFSF-----DTQLLYIVVSKHEHTYRFFFKKESSAPPKPWELNIGPGLT

Sp-Ago 219 IEKHVTHPYQYDFYLISSHPSIQGVSVPVHYTVLHDEIQMPDQFQTLQYNLCYVYARATS  
Tc-Ago2a 220 VDTHITNPMQDFYLVSHASIQGVAKPTKYCTLWDDNNMSNDDIEELTYYLCHMFTRCNR  
Tc-Ago2b 222 VDTHITNPRMDFYLVSHASIQGVAKPTKYCTLWDDNNMNDDIEELTYHLCHMFTRCNR  
Tc-Ago1 222 VDVGITHPTEEDFYLCSHQGIQGTSRPSHYHVLWDDSHIDSDELQCLTYQLCHTYVRCTR  
Tc-Ago3 207 VDNMVTFRQFYDFFLVPPQSVROGTVNPTHYVVLVDEGNIKPDHLQRLAYKLCIYYNWSG  
Tc-Piwi 208 VDDVITLPERYDFYIVSQCVROGTVAPTISYNVIEDSMGLPPEKLYLTYYKLTHTMYNWSG  
Dm-Ago2 219 VDRITVHPNEMQDFMVSHQAIQGTAKPTRYNVIENTGNLIDIDLLQCLTYNLCHEMFPFCNR  
Dm-Ago3 207 VDQHITKSNMYDFFLVSQLVROGTVTPHYVVLRDDCNYPDIIQKLSYKLCFLYYNWAG  
Dm-Piwi 212 VDDVITLPERYDFYLVSQQVROGTVSPTSYNVLYSSMGLSPEKMKOKLYKMCHEYYNWSG  
Dm-Aub 217 VDDVITLPERYDFYLVSQAVRIQGTVSPTSYNVISDNMGINADKLOMLS YKMTHTMYNWSG  
Dm-Ago1 222 VDVGITHPTEEDFYLCSHQGIQGTSRPSHYHVLWDDNHFDSEDELQCLTYQLCHTYVRCTR  
Ce-Alg1 221 VDVGITHPTEEDFYLCSHAGIQGTSRPSHYHVLWDDNNTADELQCLTYQMCHTYVRCTR  
Ce-Alg2 221 VDVGITHPTEEDFYLCSHAGIQGTSRPSHYHVLWDDNNTADELQCLTYQMCHTYVRCTR  
Ce-Prg1 227 VDTTVTRPERMDFYLVPPQFVNQGTVPVSYNLIHDDTDLGPDKHQQLAFKLCIYYNWQG  
Ce-Prg2 227 VDTTVTRPERMDFYLVPPQFVNQGTVPVSYNLIHDDTDLGPDKHQQLAFKLCIYYNWQG  
Ce-RDE1 240 VDKLIVSKYKEDDFFLASHHGVLGTSRPGHYTVMYDDKGMSEQDEVYKMTYGLAFLSARCRK  
Ce-Ergo 226 IEDAVITNKYYDFFLSTQIGNEGCFRPTHYYVVLHDTWTGKPDFWPTVTHALTYNECRSIT  
Ce-PPW1 220 VDHTIVSNVYTEWYHASAVAROGTATKFTLIFTTKAGQAEPLHLEQLTNDLCYDHOIVFH  
Ce-PPW2 221 VDYGVITNPACKQFFLNSHMTIQGSAKTPLYTVLADDRNIGMSALEEFTENLCHLHQIVGL

Sp-Ago 279 AVSIVPPEVYYAHLVSNLARYQDV  
Tc-Ago2a 280 SVSYPAPTYAHLAAARAKVYVE  
Tc-Ago2b 282 SVSYPAPTYAHLAAARAKVYIE  
Tc-Ago1 282 SVSIPAPAYYAHLVAFRARYHLV  
Tc-Ago3 267 TIRVPAPCLYAHKLAIVGQYIK  
Tc-Piwi 268 TVRVPAPCQYAHKLAFMVSQYIH  
Dm-Ago2 279 SVSYPAPAYLAHLVAARGRVYLT  
Dm-Ago3 267 TVRVPACCMYAHKLAYLIGOSIQ  
Dm-Piwi 272 TTRVPAVCQYAKKLATLVGTNLH  
Dm-Aub 277 TIRVPAVCHYAHKLAFLVAESIN  
Dm-Ago1 282 SVSIPAPAYYAHLVAFRARYHLV  
Ce-Alg1 281 SVSIPAPAYYAHLVAFRARYHLV  
Ce-Alg2 281 SVSIPAPAYYAHLVAFRARYHLV  
Ce-Prg1 287 TVRVPAPCQYAHKLAFLTAQSLH  
Ce-Prg2 287 TVRVPAPCQYAHKLAFLTAQSLH  
Ce-RDE1 300 PISLPVPVHYAHLSCCKAKELYR  
Ce-Ergo 286 TVALPAPVLYAHLAAKRAKETLD  
Ce-PPW1 280 PVGLPVELYIADRYSQRCAMVLA  
Ce-PPW2 281 PTSIPTELYVANEYAKRGRNLWN

## RdRP families

Branchiostoma 1 WRCALSRGYKVS DRTASALHQIAD TELKHVYVARKVWVTPITQMLELKLKPEPIVENRVVREY  
Schizosachara 1 PDYKHRCSLINDKENLKKLSKERAKKFLSSIHKKLYVTPITTRIVEDSIEAGNRVIRNF

Neurospora 1 EDVRYQLEVCI SQGRARLILEYVADEYAHCAWVRRVTITPTRIYESTPCVEPTNRVLRQW  
Aspergillus 1 FSVRYQLEVCI SNGQATKLEHVATQKRYCCYIRSARVTPSTVYYETPMSDMSNRIIRHY  
Coccidioides 1 FTLKFKIAKLVWNGNLEYPSPDTHESDVNNVVKVHRAQVTPSGTYLYGPNIETKNRVLRQY  
Arabidopsis 1 FEILFKINTLVQNAACLEKLFHLECCYEGLVVYMYRVQVTPARVYFSGPEVNVSNRVLRHY  
Nicotiana 1 YKILFKISSLIQHGALEKLYLKECCYDGLVYVRRVWVTPCKVYFCGPEVNVSNRVLRNY  
Hordeum 1 YEILFKINHLVQNGALEKMSYLKKTCLNGLVYVYRVQITPAKVYFYGPEINVSNRVLRNY  
Solanum 1 YKILFKISSLVQHGALEKLYLKECCYDGLVYVRRVWVTPCKVYFCGPEVNVSNRVLRNY  
Ce-egol 1 FAITYLLECLLSRGGLEDLVHMDGRKRGYQVRVKLIIFTPTRVLYVAPETLMGNRVLRRY  
Ce-RRF1 1 FSITYLLECLLSRGALEDLVHMDGRKRGYQVRVKLIIFTPTRVLYVAPETLMGNRVLRRY  
Ce-RRF3 1 FRANYALQALITRGTLEQLLNAFDERRQNCVSAKVIIVTPSRILLMAPEVMMVNRVVRRE  
Dyctiostelium 1 YESSLEINCFIQGGIITSLISKRTKFINFTMIRDVFTTPSRITFIQPTLQORSCRVRKF  
Tetrahymena 1 FNLISYSILTLISHNGIQYYYNQKKEINRKVIATRVRVSIITPSGLIYNLKELELSNRVLRIF

Branchiostoma 61 G--VDNFI RVAERDEDFSKLAVTSRVKDVLERGIRIGERHFVKYLGSSNSQMRHGCWMYA  
Schizosachara 61 KDFANRFMRVQITDEYYKQKILYSRIQQILTYGIKVGNOIYEFLLAFGNSQLREHGAYFFA  
Neurospora 61 KHAQDYFIRIQFTDEVLEGRILEFLRVYRVLEKGVAMGPWHKFLAFGNSQIREAGAFMFC  
Aspergillus 61 IEYADRFLRVRFTEKLLGRIVFTRVKRALANGIVIGDRRYEFLLAFGNSQIREHGAYFFA  
Coccidioides 61 NDHINNFLRVSEFVDETDGDPVYFHERFKGVILKQGIKIGGCHFSFLGFSHSSLSRSQTCWVFA  
Arabidopsis 61 SKYINNFLRVSEFVDEDELEKVRLYDRISVLRDGIIVIGDKKFEFLAFSSSQLRENSAWMFA  
Nicotiana 61 SEDINNFLRVSEFVDEEWEKIHIIYERILSTLRNGFIIGDKRFEFLAFSSSQLRDNSVWMFA  
Hordeum 61 AADLDNFLRISFVDEDECEKLRVLRVLSVLSNGITIGDKHFDLAFSSSQLRDNSAWMFA  
Solanum 61 SEDIDNFLRVSEFVDEEWEKLYIYERILSTLRKGFVIGDKKIEFLAFSSSQLRDNSVWMFA  
Ce-egol 61 DHGTRVLRITFRDDNOKMRLEKTVNQYLKNGITVAGRNFGLGSSNSQMRDNGAYFME  
Ce-RRF1 61 DKDTRVLRITFRDDNNKMRLEKTVNQYLKNGITVAGRNFGLGSSNSQMRDNGAYFMM  
Ce-RRF3 61 G--PDYALRCVFRDDNLGRILAVTEGYLTLKNGIQVADRVYSEFLGWSNSQMRDQGCYLYA  
Dyctiostelium 61 G--SSNFIMVKIVNESLEPLIQHENRIKPILEGGILVGGKIYSYACNSNSQLREYSSWVFS  
Tetrahymena 61 QDSTDSEIRGTIQDDSLNAK---RYFRQKLSFKVLNWEIINFGWSASQLRNSSSWFFH

Branchiostoma 119 AVDTTSTSDIRGWMGDLSEHCVAITYVSRLGQFFSSSRNAT-HTFSDGIGKISVPLAKKV  
Schizosachara 121 SGSDLNAKQIREWMGDFSEINSVSKYAARMGQCFSTTKEINNHCFTDGVGMASLSVIRRL  
Neurospora 121 EQSNLTGDMRAWMGRFSSHIVLAKYAARLGQCFSTTRLVDGFCFTDGVGKISPLLAKIV  
Aspergillus 121 PLPNLTAANIRAWMGHFDIRNVAKHAARLGQCFSTTRAIINGYRFSDGVGRISKFLAQMV  
Coccidioides 121 PFTRFDAQSI IQGIGSFSHIYSPAKLAARIGQTFSETQTSNGRVFSDGVGTFSPRILLYKI  
Arabidopsis 121 PIDRITAAHIRAWMGDFDHIRNVAKYAARLGQSFSSSRETTRYVFSFDGIGKISAEFARKV  
Nicotiana 121 SRPGLIANDIRTWMGDFRQIRNVAKYAARLGQSFSSSRETTRYVFSFDGIGKISADFAHRV  
Hordeum 121 SRPGLSASDIREWMCNERNIRNVAKYAARLGQSFSSSRETTRYVFSFDGIGTISADFADEV  
Solanum 121 SRPGLIANDIRTWMGDFSQIKNVAKYAARLGQSFSSSRETTRYVFSFDGIGKISADFAFRV  
Ce-egol 121 KYSNPKIQAAARKNLGRFETIDNIPKMMARLGQCFIQSRLSDEYTFSDGVGMMSYRFAQMV  
Ce-RRF1 121 RFTKPKIDEVRFQIGRFSEIENVPKLMARLGQCFIQSRLTSEYTFSDGVGMMSYQFAQEV  
Ce-RRF3 121 PRVTGTVEDIRVWMGDFRDAISVPKMMSRMGQCFIQAOPTNKYCFSDGCGRISIKLATHI  
Dyctiostelium 119 NQI---THTVKIWSG-IEHVDNVRKIFRCLGLMFSTTIPTNTHVFTEGCGEIGPELAKHL  
Tetrahymena 118 ETEVLKKQDVITRIGDFSGINPPAKKSARIGQCFSSSTPYKKKVFIDGIGTISQDLIRKI

Branchiostoma 178 PSAFQIRYAGCKGVLAQDPTLRIQIRGSMKKFETLEVTSGRIMMGTMDETGKLOYGQVFI  
Schizosachara 181 PSAFQFRMGGYKGVLSLAPPTLVFPRFSQDKFKKVSVPKAYLLGVADETGTLKGHYDDA  
Neurospora 181 PSAYQFRMGCKGVLVTFDVEVHIRKSQEKFVRLNVEKSAFVLGCVDETGTLKGHMKVIT  
Aspergillus 181 PSVFQFRLGGCKGILTVSPQAEVHIRKSQAKFTKITIDKACVFCMDETGTLKGYFHEK  
Coccidioides 181 PTVFQIRFAGAKGMVSLDTRLQIRLRESMVKFSRIRVPEAVTLYGIMDETGYLEGELFC  
Arabidopsis 181 PSAFQIRYGGYKGVVAVDPNKSLSRKSMSKFERIFISGGRSMMGCLDETRTLEYQGVV  
Nicotiana 181 PSSFQIRYGGYKGVVAVDPYKSLSRKSMLKYERIFIPNGRTMMGCLDESRTLEYQGVV  
Hordeum 181 PSAFQIRYGGYKGVVAIDPYSKLSRKSMSKFORIFVPKGRAMMGCLDETRTLKYQGVFI  
Solanum 181 PSAFQIRYGGYKGVVAVDPYKSLSRKSMSKYEERIFIPNGRAMMGCLDESRTLEYQGVV  
Ce-egol 181 PSCFQFRERGMKGVISIEPLLNCMFRPSQIKFIQIPIPCGRSMLGVVDETGRLQYQVFI  
Ce-RRF1 181 PSCFQIRFRGNKGVIAIEPFLKCLFRPSQIKFQQIPIPSGRSMLGVVDETGRLQYQVFI  
Ce-RRF3 179 PACFQVRFKGFKGIILVIDPTIKVIFRKSQQKFGKIFLPPGRSMYGVVDETGRLQYQVFI  
Dyctiostelium 175 TCAYQVRIIGGNKGMVWVNNQAGTYIRPSMVKFNHIEIKDSRMLLGVCDPTNSLPPNTVFI  
Tetrahymena 178 MCALQVRYGGAKGVLTIDYKSTIQIRESMIKYNKIFLKK SARLMGVIDEYNVLEQDEVEA

Branchiostoma 238 QYSVVHQGVTVTKNPYFHPGDMRKFTAQVAVDVPVPELRHMVDCIVFVPSRGPRPHPEMSGSDL  
Schizosachara 241 VLSRVIVGLCTVARNPSLHPGDVVRVCKAVRCDELMHLKNVIVFPTTGDRSIPAMCSGGDL  
Neurospora 241 EDWRVITGTCVVGRRNPSLHPGDIRVVEAVDVPALRHLRQVVFVPLTGDTRDVPMSCSGGDL  
Aspergillus 241 IPDEVITQGMCLARNPSLHSGDIRVVKAVDVPALRHLQDVVVLVPLTGDTRDIASMCSGGDL  
Coccidioides 241 TELILVRDQVIVTRAPALHPGDVQYAKAVDVPPLRSLHNCVIFSOHGFRDLPSMISGGDL  
Arabidopsis 241 QYSEFIIITGFPVVAKNPCLHPGDVRLQAVNVPALNHMVDCVVFVQKGLRPHPNCECSGSDL  
Nicotiana 241 QYSEFIIKGNVVVAKNPCLHPGDIRVLRVAVDVPALHMHMVDCVVFVQKGLRPHPNCECSGSDL  
Hordeum 241 QASSVVTGKVIIVAKNPCLHPGDIRLILQAVHSPVLLGHMVNCVVFVQKGLRPHPNCECSGSDL  
Solanum 241 QYTFILKGNVVVAKNPCLHPGDIRVLRVAVDVPALHMHMVDCVVFVQKGLRPHPNCECSGSDL  
Ce-ego1 241 QYTVQVLTGTVLLTKNPCLVAGDVRIFEAVDIPVPELHMHMVDCVVFVQKGLRPHPNCECSGSDL  
Ce-RRF1 241 QYTEIVTGTVLLTKNPCLVPGDVRIFEAVDIPVPELHMHMVDCVVFVQKGLRPHPNCECSGSDL  
Ce-RRF3 239 QYSILKTKGKVLITKNPCHVPGDVRVFDVAVWQPALAHLVDVVFVQKGLRPHPNCECSGSDL  
Dyctiostelium 235 QLEKVIIEGLVMVTKNPCTHPGDVRYLKAVDNL-LRHLRNVIVFVSTKGDVVPNFKEISGSDL  
Tetrahymena 238 YISFQVEGDVIVVKNPCLHPGDIRKLRKAVTLEPFKKLRNLIIFVQKGLRPHPNCECSGSDL

Branchiostoma 298 DGDYFVITWREGLILPRENRPAMDFTAQKRVLHRPVQESDMIEFFAAYIGSNQLGLIANA  
Schizosachara 301 DGDEYTVIWDQRLIPKIVNYPLESSEPKKIDFLEIGKPLIDSVKEFFVNYIKYDLSGLIISNA  
Neurospora 301 DGDDFVFIWDFELIPKERSHPMISEPIGKELATEPTVNNLIITFFVLYMKYNNLPIIAHA  
Aspergillus 301 DGDDYVVIWDDLIIPKDWFRPPMNYTTNARDLDRDVTVDVDEITSFFVLYMKNDCLPTIAHA  
Coccidioides 301 DGDLYNVIIYDERLMPPCTYPP-ANYPKVEKLLDREVVRDDIIDFFVTFMQDQLGRIATI  
Arabidopsis 301 DGDYFVFCWDFDLIPPRQVQSMYTPAPTQILDHVDVTEEEVEEYFANYIVNDSLGLIANA  
Nicotiana 301 DGDYFVFCWDFDLIPPRQVQSMYTPAPTQILDHVDVTEEEVEEYFTNYIINDSLGLIANA  
Hordeum 301 DGDYFVFCWDFDLIPTRMVAFPMYTPAPTQILDHVDVTEEEVEEYFTNYIVNDSLGLIANA  
Solanum 301 DGDYFVFCWDDMIIPPRQVQSMYTPAPTQILDHVDVTEEEVEEYFTNYIVNDSLGLIISNA  
Ce-ego1 301 DGDEYSIIWDQQLLLDKNEDPYDFTSEKKASFKEDEIDDLMREFYVVKYIKLDSVGOISNS  
Ce-RRF1 301 DGDEYSVVIWDQQLLLERNEEPPDFAVEKKVPYDREKLDVLMREFYVTKYIKLDSVGOISNS  
Ce-RRF3 299 DGDEYSIIWDQQLLDYNEEA-MVFPSSAAEEDKEPTTDDMVEFFLRYLQODSIGRMSHA  
Dyctiostelium 294 DGDRYFFCYDKSLIGNRSKSEYLGDETVNNDKKNNDPFALSSMYSTNVERQELGKMYNS  
Tetrahymena 298 DGDYFVFCWDFDLIPPRQVQSMYTPAPTQILDHVDVTEEEVEEYFTNYIVNDSLGLIISNA

Branchiostoma 358 HLIVHADKEDQGIIFSQKCIDLAQLHSDAVDAPKTGELKGDLPPEVYPDFMMSKDKPOYSER  
Schizosachara 361 WKAWADNNPEGIFGNVCLLELAEMHASKAVDFAKSGKMQAKYHPKRYPDFMOKTKTRSESET  
Neurospora 361 HLAATADAEVGVKSPKCLELASHMSAVDVKVTGFEFPRRLDPKTPHFMKRNRYTHSVT  
Aspergillus 361 HLAWADRLDNGVDEEKIRLAQLHSDAVDYNKNGHMTRNLEPKLWPHFMKKEKVKYKSGK  
Coccidioides 360 HQAIADQRPACTLDQDCLLAEHLHSAVAVDFSKSGLTRIPKRPYYPDFMAPSRIKIASIE  
Arabidopsis 361 HTAFADKEPLKAFSDPCIEELAKKFSSTAVDFPKTGVIPOHLYVKEYPDFMEKPKDKPTYSKN  
Nicotiana 361 HVVEADRDPDAMSDPCKQLAQLFSTIAVDFPKTGVIPOHLYVKEYPDFMEKPKDKPTYSEK  
Hordeum 361 HVVEADRQSLKAESTQCIKLAELFSTIAVDYPKTGVIPOHLYVKEYPDFMEKPKDKPTYSEG  
Solanum 361 HVVEADRDPDAMSDPCKKLAELCSIAVDFPKTGVIPOHLYVKEYPDFMMDKPKDKPTYSER  
Ce-ego1 361 HLHNSDQYGLNAR--VCMDLAKKNCQAVDFTKSGEMIPPERAERVDPYHMGNHTPMYSR  
Ce-RRF1 361 HLHNSDQYGLNSR--VCMDLAKKNCQAVDFTKSGEVIPPENPERIPDFHMGNHTPMYSR  
Ce-RRF3 358 HLAYA--DLHGLFHENCHATAALKCAVAVDFPKSGPSSFEQCEMTDPYMMSGGKPMYSTR  
Dyctiostelium 354 HLAIS--DLFGANHEFSTQLSKECFKEDYPKTGVIPOHLYVKEYPDFMEKPKDKPTYSKN  
Tetrahymena 358 HLVEADKSPLYAEDPKCLKLAELHQAQAVDYAKTGVIPOHLYVKEYPDFMEKPKDKPTYSKN

Branchiostoma 418 IIGRLFRKQELVREGFDSYIEDAQQLNINNMMSIMSLYGITSEGEVVSQCILKVKQ  
Schizosachara 421 AVGKIFRYAARKLPRFKTEYLNVAEEVKKHYDNDLRSIMAREDISTEYEVYTAFILFKDD  
Neurospora 421 ALGKLYDMVVRKCRALRGTAKARRIKSQYDTAMRRVMCQLEIATEFEVWVAFVMSKPR  
Aspergillus 421 IIGQLYDAVERIP--VAEDLYQFARDMCKDYDIALRRIMAQHEIKTEFEVWVSTFVLSHAN  
Coccidioides 420 VVEEEQYLAEDINEQELNVAARNASKLRRDNTLLNATWDYVASETEGFQWDHLVEDGRK  
Arabidopsis 421 VIGKLFREVKEMEVDGHEEYVDEAFYQKANYDFKLGNLMDYYGKTEAEIISGGIMRMSK  
Nicotiana 421 VIGKLFQKVKNMIVDGFEDYIDEAFYKSEYDNKLGNLMDYYGKTEAEIISGGIMKASK  
Hordeum 421 VIGKLYREIKKLIIVDGYQDYITEAVWFKEEYDFKLGNLMEHYGINSEAEIISGCILKMAK  
Solanum 421 VIGKLFREVKEMEVDGHEEYVDEAFYKSEYDNKLGNLMDYYGKTEAEIISGGIMKTSK  
Ce-ego1 419 LCGKLFREFKAIKIDGYTEYMASAKNDLARYNAQLRSMMENYGIKTEGEVVSQCIVDMRN  
Ce-RRF1 419 LCGKLFREFQAFVVTGFEYRYSQAQQLSSYNGQLRSIMENYGIKTEGEVVSQCIVDMRN  
Ce-RRF3 416 LCGKLFREVKEMEVDGHEEYVDEAFYKSEYDNKLGNLMDYYGKTEAEIISGGIMKTSK



Dyctiostelium 412 IMGKMYDQIDQNLVDDYEIYINSAKILYSQYKLVHSLIRHYSAESEEESIMIGFI DQGF I  
Tetrahymena 418 IIGILYRQVKDENKTYLEQEIDFAIEANNQWNIEINNLKQFFGAQNEFEIYTCNFSKLIK

Branchiostoma 478 RLKNERFEVAEYVTLWRKTRAEFFKQFDVLKASAWYMVVYSDSPKLLSFPWVYDVLAS  
Schizosachara 481 LVNEYGLREEVSFLLKKKYTOEYLEKCALNSAVAATYDVTYDQTEVLI SFPYLFSSRLCQ  
Neurospora 481 VYKIQDNVGRESSALKQHFKDQCKKEAGLSFVVSAMYRVTYEETMPLV SFPWLFWDKIGE  
Aspergillus 479 MYKFHEEIGMLSSSIREGFKRECYDKVGGAPLALAMYRI THEEQPLI SFPWIFPRVLGQ  
Coccidioides 480 VYEDKLR EIMQQYTPWKSSLTEVEVVMGNSNSKQSRRDKEASQSTPLSAQLEPLFGTHYMRS  
Arabidopsis 481 SKRRDAESI GRAVRALRKETLSLENASEE SAKASAWYHVYH SRDHFISFAWCVYDKLVR  
Nicotiana 481 TRRKDAEAI GVAVRCLRKEARAWFKRRSD LAKASAWYHVYHHRDHFISFPWCVYDQLIQ  
Hordeum 481 NKKSDADAIRLAVKSLRKEARSWFSEMGSVAKASAWYHVYHPRPHLISFPWCVYDKLIL  
Solanum 481 TRRKDAEAI SIAVRALRKEARTWFKRHNDLPKASAWYHVYHPRDHFISFPWCVYDQLIQ  
Ce-ego1 479 RKDQDDMSFFNTNQMIETKLTNLFKKYREEGNTEAF SRYGRDSENKKSFAWLAYDVI AK  
Ce-RRF1 479 RKDQDDMSFYNTNQMIETKMTSLVCKFRETVKCTLLPNAYDNGEVRKLSFAWLAYDVI AK  
Ce-RRF3 476 LERDDYSFYHTDKKIYAVFRAKFFEEFEGGKNTRLKCTKAMHEKRCIGQSLPWWAIDALCD  
Dyctiostelium 472 SSKDIKGEKNDYKIQQTFENEELKEFGEEKKVS AWYHVAYSDNKKKDTLFPVYESRLMI  
Tetrahymena 478 VKKMSAEIVQORIAIKNRFELLEFKNLDEKIRATLWYIICYLRKDSLIGQTF TFLSQQKY

Branchiostoma 538 LKKI  
Schizosachara 541 LSRK  
Neurospora 541 LARA  
Aspergillus 539 IATG  
Coccidioides 540 IVDR  
Arabidopsis 541 IKKT  
Nicotiana 541 IKKA  
Hordeum 541 IKQK  
Solanum 541 IKKE  
Ce-ego1 539 VKQD  
Ce-RRF1 539 VKET  
Ce-RRF3 536 LRRQ  
Dyctiostelium 532 VKEL  
Tetrahymena 538 FGET

## Eri-1-like nucleases

Ce\_eril 1 DYLLAIDFECTCVEI IY---DYPHEIIE LPAVLI DVREMKIIS--EFFTYVRPVRNPKLS  
Ce\_M02B7.2 1 DYLLVLD FEATCQDNWKGMPHPVQEIIEFPVVLSTADWSEIR--RFHOYIKPTEFPRLT  
Hs\_3hExo 1 DYLCIIDFEATCEEIGNPP--EFVHEIIEFPVLLNTHLEIED--TFQOYVRPEINTQLS  
Hs\_NP542394 1 DYLLVIDFESTCWNDGKHH-HS-QEIIIEFPVLLNLTSTGQIDS--EFQAYVQPEHPHLS  
Hs\_Pint1 1 HYFLVIDFEATC-DKQP---IHPQEIIEFPVLLKLNRTMEIES--TFHMYVQPVVHPQLT  
Tc\_Snp 1 DYLLVLD FEATCWSNGDPR-KNPAEIIIEFPVVLVDVKNAKIIA--EFQOYVMPVENPKLS  
Dm\_Snp 1 SYVIANDFEATCWEKQAPPEWREAEIIEFPVVLNLTGKIEA--EFHOYILPFE SPRLS  
Urchin\_1 1 DYLCVIDVFEATCQEIINPV--DYIHEIIEFPVLLNLTQIVN--TFDAFCCKPVINPQLS  
Urchin\_2 1 SYLLVIDFESTCWKDKKN---TSQEIIEFPVLLNLTGQIES--EFQOYVMPDEHPVLS  
Urchin\_3 1 DYFLVIDFEATCLDNER---IEPQEVIEFPVLLKVS GKTFFETA--TFHOYVEPQVH-GVG

Ce\_eril 56 EFCMQFTKIAQETVDAAPYFREALQRLYTWMRKFN-----LIGQKN  
Ce\_M02B7.2 59 SFCTSLTRIIQEMVDEKPKLPEVLSEFDSWLKEDS-----RLK-Q  
Hs\_3hExo 57 DFCISLTGITQDQVDRADTFPQVLLKVIDWMLKE-----LIGTKY  
Hs\_NP542394 57 EFCMELTGIKQAQVDEGVPLKICLSQFCKWVHKIQQQKNIIFATGISEP-----SASEV  
Hs\_Pint1 55 PFCTELTGIIQAMVDGQPSLQQVLEFVDEWMAKEG-----LLDPN  
Tc\_Snp 58 DFCTELTGIIQHQVDNCPVLPQACLLLSRWVAEKMSLYDMDFPNGESQ-----AT  
Dm\_Snp 59 ACTELTGIIQKTVDSGMPILRTAVMFEWLRNEMRARNLTLPKMNS-----NIL  
Urchin\_1 57 KFCSQLTNIISQKMVDKADFPVLEKAEERWVRQKG-----LIGSKH  
Urchin\_2 56 DFCTELTGIIQEQVNGVPLFICLNKFTSWLKKIESEKNLAYNRS-TD-----DTR  
Urchin\_3 55 EFCRTLGTITPDMVKGQPTFADTLKLEHVWMEKEG-----LVDPE

Ce\_eril 96 SREAFVTDGPHDMWKFMOFQCLLSNIRMPHMFR-SEINIKKTFKEKENGL--IKGNKGSG  
 Ce\_M02B7.2 98 GNEAFVTCGDWDLKVALPSEAKFKNIEIPEYFN-QWINVVKAYAEHTN-----HFAK-G  
 Hs\_3hExo 97 K-YSLTLDGSDWMSKFLNIQCQLSRLKYPPFAK-KWINIRKSYGNFYK-----VPRSQTK  
 Hs\_NP542394 111 KLCAFVTWSDWDLGVCLYEYCKRQQLKPVFLN-SWIDIRATYKLFYR-----RKPK-G  
 Hs\_Pint1 95 VKSIFVTCGDWDLKVMPLPGCQYLGIPVADYFK-QWINLKKAYSFAMG-----CWPKN  
 Tc\_Snp 108 KTCAFATWSDWDLGTCLRKECIRKNIKRIEKMYR-KWIDIRALEFKRYIR-----RPFY-G  
 Dm\_Snp 110 GNCAFVTWTDWDFGICLAKECSRKGIKRPAYFN-QWIDVRAIYRSWYK-----YRPC-N  
 Urchin\_1 97 S-FALATDCSLDMDIYLKLOCLVSEIPYPOYAK-EWVNIISKVEANLYK-----TKR--LP  
 Urchin\_2 106 KLCTFVTWSDWDLVCLRYECQRKQIYKPSALN-HWIDARAVYRNEYQ-----RKPK-G  
 Urchin\_3 95 VKEIFVTCGDWDLKTMFSPQCAHFELPYHSYFR-RWINIKKAFATVTS-----HYPK-G

Ce\_eril 153 IENMLERLDLSEVGNKHSGLDDATNIAATAIQMMKLK  
 Ce\_M02B7.2 150 MTQQLLAIYKLOHQGRLLHSGTDDVANICEIVRCLGRDG  
 Hs\_3hExo 150 LTIMLEKLGMDYDGRPHCGLDDSKNIARIAVRMIQDG  
 Hs\_NP542394 163 LSGALQEVGIEFFSGREHSGLDDSRNTALLAWKMIRDG  
 Hs\_Pint1 148 LLDMMNKGLSLQHGIRPHSGIDDCKNIANIMKTLAYRG  
 Tc\_Snp 160 IAGALAEGLITEEGTEHCGLHDARNTARLVGKMVDKG  
 Dm\_Snp 162 FTDALSHVGLAFEGKAHSGIDDAKNLALMCKMVRDG  
 Urchin\_1 148 IRLAML DSTGLAFIIGQPHRGIDDARNIARVALQLIEDG  
 Urchin\_2 158 LSGALQEVGIEFFAGROHSGLDDAKNTAILVWFRMIQDG  
 Urchin\_3 147 MMQMLERLNIIPHVGRHHSGLDDCRNIANILQALALKR

## Sid-1-related proteins

Tc\_A 1 YLWHILSIAIFYSIPVVMQLVITYQRVVNR---TGDQDMCYYNFLCANPAFGLSDFNHIIFS  
 Tc\_B 1 YLWQILNVGLFYIIPVILQLVMTLQSFILIQ---TGDFDLCYYNFLCANPLWIIISDFNHVFS  
 Tc\_C 1 YLYNVLTVALFYGLPVIQLVVTYQALNE---TGQDLCYYNFLCAHPLGVISDFNHVFS  
 Ce\_sid1 1 LHGOMLQYPVAIILPVLMTHTAIEFHKWTSTMANRDEMCFHNNHACARPLGELRAWNNIIT  
 Ce\_tag130 1 YKIALAIIIGIFYNITVLLQLIISKAGSLRQ---SGDLDECTENFOCARPLWYFVAFNNVVS  
 Ce\_Y37H2C1 1 KYENFLFFQLFGSILPALTTIFQNRILQKAN--KTNLDTCYLNYRCSLNVIGFNSFNMSMTS  
 Am\_sid1 1 YLYYLIITVALFYTLPAVQLLITYQHVLHV---TGNQDMCYYNFLCAHFFQALSDFNHVFS  
 Hs\_sidT1 1 YFWNIITIAVFYALPVIQLVITYQTVVNV---TGNQDLCYYNFLCAHPLGVLSAFNNIILS  
 Hs\_sidT2 1 YFWNIATIAVFYALPVMQLVITYQTVVNV---TGNQDLCYYNFLCAHPLGNLSAFNNIILS  
 Bm\_3022 1 YFWGALTLAVVYALPVMQLLITYQRMVFQ---TGDQDLCYYNFLCAHPLGLTSLDFNHVFS  
 Bm\_3026 1 YLWIVLTVSVFYTLPVLQLVMTYQRLINQ---SGNQDLCYFNFFCAHPLMMLSDFNHVFS  
 Bm\_2839 1 YLHTLYTVAVFYALPVLQFVAAEQVMLNI---SGSLDMCYYNFLCAHPAGGLSDFNHVFS

Tc\_A 58 NVGYLIVGILFLGLVVLHROTKIPNSST-----GIPVHYGVYAMGIALIEGILSA  
 Tc\_B 58 NIGYILMGIVFSINVFYRHFYSPPLTT-----GVFANYGVYAMGAALIMEGVLSG  
 Tc\_C 58 NSGYVLLGLLFLGITYRREITHKDLNFER-----QYGIPOHYGMFYAMGVALIMEGVLSG  
 Ce\_sid1 61 NIGYTLYGAFIVLSICORRRHEYSHV-----FGTYECTLLDVTIGVFMVLQSIASA  
 Ce\_tag130 58 NCGYMYFGTLIIVMNYCRERSFRRLFVAVQPTLAERYGLPOHSGLMTAIGLAVIMEGISSA  
 Ce\_Y37H2C1 59 ASSLAVLGIINLIVFRKQIFRYEIPRFPT----SRGIQORDAPKIVCLLGLVALGVYSA  
 Am\_sid1 58 NIGYIMLGFLFLFLTSFREHNEFDKEKNK-----CYGIPOHYGLFYAMGTALIMEGITLSG  
 Hs\_sidT1 58 NIGHVLLGFLFLIVLFRDILHRRALEAKDIFAVEYGIKHFGLFYAMGTALMMEGVLSA  
 Hs\_sidT2 58 NIGYILLGFLFLIILQREINENRALLRNDLCALECGIPKHFGLFYAMGTALMMEGILSA  
 Bm\_3022 58 NVGYVLLGAVFAGQVRFQVKSFRORPE-----NLGIPOHYGLLYSMGLALSMEGILSA  
 Bm\_3026 58 NIGYVLLGALFLLQVWRQRIMRNEPEEKK----QKGIPOHFGLLYAMGVALISEGFLSA  
 Bm\_2839 58 NIGYILLGALFMIQLQRKRNRKRAPR-HE----EYGIPIAHYGLLSSIGAAMMVVALISA

Tc\_A 109 CYHICPSQSNYQFDTSFMYVMAVLCMIKLYQNRHPDVNATAYATFTVLGMAIFLAMIGIL  
 Tc\_B 109 CYHICPNETNFQFDTSFMYVMIVLCLVLYQNRHPDVPTAYTTFSTILGATILCGTIGIV  
 Tc\_C 113 SYHVCNNTANFQFDSFMYVMAVLCMKLYQNRHPDINATAYATFGVLAVAILLGMIGIL  
 Ce\_sid1 113 TYHICPSDVAFQFDTPCIVQVICGLLMVVRQVFRHESPSF-AYINILLVGVVSLN-----  
 Ce\_tag130 118 TYHVCNPNINIQFDTALMYVIGMLGKIKLWVSLRHPDMVVSAYHAFGFLGVFLMAAAGVY  
 Ce\_Y37H2C1 115 ILNNCQCKSMLOFYDYTIILWVQYSALILWVYSKRHG-MFVVDSLSRLLIKIVFSICSTIGFT  
 Am\_sid1 113 SYHVCNPNRSNFQFDSFMYIITVLCMIKLYQNRHPDINARASVTFAMLAFLIFINLMGVL

Hs\_sidT1 118 CYHVCNPYSNFRFDTSFMYMIAGLCMIKLYQTRHPDINASAYSAYASEFAVVIMVTVIGVV  
Hs\_sidT2 118 CYHVCNPYTNFQFDTSFMYMIAGLCMIKLYQKRHPDINASAYSAYACLAVIFFSVIGVV  
Bm\_3022 111 CYHLCPNKMNQFQDSFMYVIAVLTIKLYQNRHSDIIPSAHSTFMTLAVIMTIGLFGIL  
Bm\_3026 114 AYHVCNPNSMNFQFDTSFMYVTSALCMVKTYQSRHPDINARAHATFGVLALITIFIGLVGVL  
Bm\_2839 113 SYHVCNPNSLNFQFDTAfMYVLAVLCMVKTYQSRHPDINARAHATFGVLAVFTIALVWVGVL

Tc\_A 169 NG-SLTVWIVFVVI--YSLLCAYISFKIYFISFVFDGFKQLKQSLKSSNKV-----EAIA  
Tc\_B 169 FK-APPVFIIVFVTIAYLVLLIYASLNIYHFGTARNFLR--RCCLRNSEVP-----RPIQ  
Tc\_C 173 EG--NLYFWIVFTIIYLLSCFYLSIQIYYMGCKLDAGIAMRVWRICVYEFWSGPLNVIK  
Ce\_sid1 166 -----FLISAFSKTSYVRFIIAVIHVIVVGSICLAKERSLGSEK-----  
Ce\_tag130 178 VH--NMIFWALFSLIYIASMLLVSLIEFYFKGIWTLNLRERNSIRLSWVSS--RHLSCVV  
Ce\_Y37H2C1 174 GYFAYKYFYERPSGLQSHQWICTPLSSQOK-VLEDDKNVKRRPLN-----  
Am\_sid1 173 NG--SIYFWILFTIITHLLTCLFMTIQIYYMGRWKFRALITRVLQVILYS--SGIRYLF  
Hs\_sidT1 178 FGKNDVWFVWVIFSATHVLASLALSTOIYYMGRFKIDLGITFRRAAMVFYTD---CIQQCSR  
Hs\_sidT2 178 FGKGNATFWIVFSLIHLIATLLSTOIYYMGRWKLDSGIFRRILHVLVYTD---CIRQCSG  
Bm\_3022 171 HP--SAGFAASFTLLHLGACLVLTIKIYYAGREKMDRRVILRAYAHVAARG----WRSLL  
Bm\_3026 174 NA--NVYFWVAFTALHLLTCFFITFQIYYLGRKLDMGWVRAASRGAALR-----  
Bm\_2839 173 GG--GPLFWSVFTVLIHVFTFLLLSIRIYYVGOERLEKSSIAVAARGLRAR-----

Tc\_A 221 PIRKSRFALLVIANIINYAMLIITGLCLYN-TGVTDFGTFLLLGILMGNSVLYAVFYTGMKL  
Tc\_B 220 SPNTHRWLWLLLAITVNIILYGLGLILFYHTKTIDFATFILQILAGNAFLYTVVYTCMKI  
Tc\_C 231 PTHKARMCLLIANLCNWGMAFWG---VYKHQ-KDFALELLAIFMGNTILYFSFYIVMKI  
Ce\_sid1 205 --LKTREFFIMAFSMGNFAIVMY-----LTLSAFHNLQIATYCFIINCIMYLMYYGCMKV  
Ce\_tag130 234 PAKKAREFVILLNLNIAATAVVYVY----LEAHPKDELSELLIPFIGNLFIYIYYILMKM  
Ce\_Y37H2C1 218 --SKMSYVFISIGYALICSVTEFL-----HSGISVHSATYFSAKQOLVIYLFYIIOKI  
Am\_sid1 228 PIYIGREFMLVIANIWNIALAVIG---NIYQE-KNFATFLLAILMSNLILYTTTFYIIMKI  
Hs\_sidT1 235 PIYMDRMVLLVVGNLVNWSEALEG---LIYRP-RDFASYMLGIFICNLLLYLAFYIIMKI  
Hs\_sidT2 235 PIYVDRMVLLVMGNVINWSLAAYG---LIMRP-NDFASYLLAIGICNLLLYLAFYIIMKI  
Bm\_3022 225 PAHPYRAGLLGLANLANWLAGYS---VYSHHNTDLARQLLAILMGNAIYTMFYVMVKL  
Bm\_3026 222 ---PSRGLMLLLANLINWGLAGYG---VAQHS-RDFASHLLLVLMTNLFLYTLFYIVMKL  
Bm\_2839 221 PLYTPRLVMLLIANAANWGFATYG---LLTHA-GDIATHLLNVLLCNTLLYIVFYVLMKL

Tc\_A 280 VN-----GERICFEALYGLIATAAWATAAVYFLDNAT--LWIVTPAESRQWNOECI  
Tc\_B 280 KCTSVRECTCSEKICAQALYGFALVTVWVLAGVFFTEAS--KWIESPAQSRQLNKQCI  
Tc\_C 287 IN-----KERVNKLSEFFISLSVICAISAMYFFLNKSI--SWSRTPAQSRQFNQECK  
Ce\_sid1 258 LH-----SERITSKAKICGALSLLAWAVAGFFFFQDDT--DWTRSAASRALNKPCI  
Ce\_tag130 290 IY-----REKIPKRALALFAAVISWTCAGILFNORVS--DWSKMPAISRELNKPCI  
Ce\_Y37H2C1 270 RFEWSS----FTFSYTIRCIFLIVFLVLFQTLNRYFANFASPFNFYESPALSRELNSECI  
Am\_sid1 284 CH-----KERILLQPCIYIVLSIVFWAAALYFFINKTI--SWELTSAQSRHYNKPCI  
Hs\_sidT1 291 RS-----SEKVLVPVLCFIVATAVMWAAALYFFFQNLNLS--SWEGTPAESREKNRCCI  
Hs\_sidT2 291 RS-----GERIKLIPLLICVCTSVVWGFALFFFOGLS--TWQKTPAESREHNRDCI  
Bm\_3022 282 VN-----RERILARTWMYCIIAHVAWFLALRLEFLDSKT--KWSETPAQSRQHNAPCS  
Bm\_3026 275 LH-----RETTITCYTWVIVLTIYSSWAGSSYFYLDQNT--NWALSPAQSRERNAACS  
Bm\_2839 277 LH-----GERIRWYSWCFLAAAAACWVPALYFFFTSGST--DWSATPARSRHRNHECR

Tc\_A 330 VMSFYDKHDVWHLLSAPALYLTFMFLLSLDDDL  
Tc\_B 338 FADFYDSRDWHEFFSSIALYFTFMYLICIDDDL  
Tc\_C 337 LLRFYDFHDIWHELSAIGMFFTFMVLLTLDDDL  
Ce\_sid1 308 LLGFFGSHDIWHIFGALAGLFTFIFVSFVDDDL  
Ce\_tag130 340 FLNFYDNHDIWHLSSAFALFFSFTAINVIDDDL  
Ce\_Y37H2C1 326 IPG-IDWNNVRHYNAVITCSEFFILLLDYIDINI  
Am\_sid1 334 LLHFEDSHDIWHELSALAMFFSFMVLLTLDDDL  
Hs\_sidT1 341 LLDFFDDHDIWHELSATALFFSFLVLLTLDDDL  
Hs\_sidT2 341 LLDFFDDHDIWHELSSTAMFGSFLVLLTLDDDL  
Bm\_3022 332 SLSFYDTHDLWHGVSAALFLSFNMLLTMDDAL  
Bm\_3026 325 VLRLFDAHDAWHAMSAVAMFLSFNMYLTLDDGL  
Bm\_2839 327 VLQFYDSDHDIWHMLSAALYFTFNVMLTWDDGL
