# Supplementary material for: Exploring systemic RNA interference in insects: a genome-wide survey for RNAi genes in Tribolium
Source: PubMed Central journal article supplement (PMC2395250; doi:10.1186/gb-2008-9-1-r10), 2008-01-17

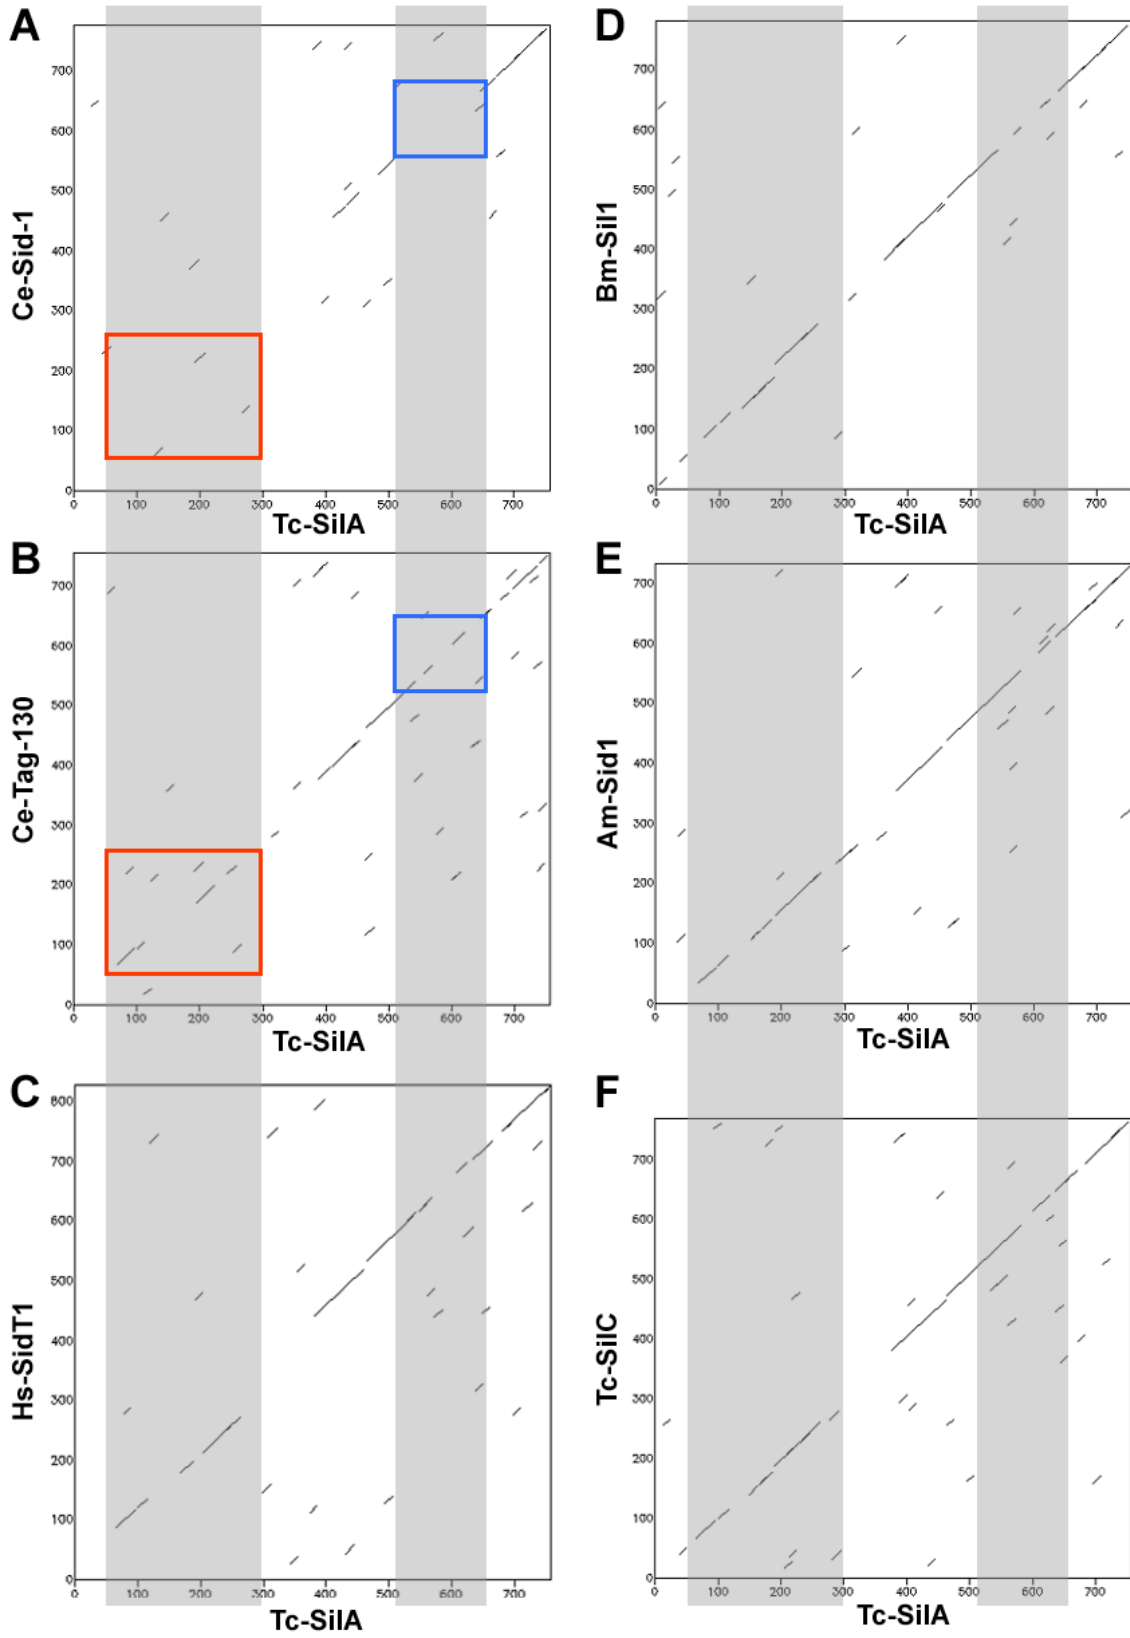

Supplement: gb-2008-9-1-r10-S5.pdf [file gb-2008-9-1-r10-S5.pdf]
