# Supplementary material for: Exploring systemic RNA interference in insects: a genome-wide survey for RNAi genes in Tribolium
Source: PubMed Central journal article supplement (PMC2395250; doi:10.1186/gb-2008-9-1-r10), 2008-01-17
Supplement: gb-2008-9-1-r10-S7.pdf [file gb-2008-9-1-r10-S7.pdf]

Table S7: *Tribolium* gene names and gene ID

| <b>Tc Gene Name</b> | <b>Tc Gene Number</b> | <b>Linkage Group</b> |
|---------------------|-----------------------|----------------------|
| Tc-Dicer-1          | 01750                 | unknown              |
| Tc-Dicer-2          | 01108                 | 2                    |
| Tc-Drosha           | 16208                 | unknown              |
| Tc-Pasha            | 15332                 | 6                    |
| Tc-Loquacious       | 11666                 | 9                    |
| Tc-R2D2             | 08716                 | 7                    |
| Tc-C3PO             | 07013                 | 4                    |
| Tc-Argonaute-1      | 05857                 | 8                    |
| Tc-Argonaute-2a     | 11525                 | unknown              |
| Tc-Argonaute-2b     | 13762                 | 5                    |
| Tc-Argonaute-3      | 08511                 | 4                    |
| Tc-PIWI             | 08711                 | 7                    |
| Tc-snipper          | 01174                 | 2                    |
| Tc-SilA             | 11760                 | 9                    |
| Tc-SilB             | 06161                 | 8                    |
| Tc-SilC             | 15033                 | 6                    |
| Tc-Rsd3             | 12168                 | 9                    |
